# Supplementary material for: Sign control of circularly polarized luminescence of chiral Schiff-base Zn(ii) complexes through coordination geometry changes
Source: Royal Society of Chemistry journal article supplement (doi:10.1039/d2cc01959k), 2022-01-01
Supplement: d2cc01959k1.pdf [file d2cc01959k1.pdf]

## Supporting Information

### **Sign control of circularly polarized luminescence of chiral Schiff-base Zn(II) complexes through coordination geometry changes**

Masahiro Ikeshita,<sup>\*a</sup> Momo Mizugaki,<sup>a</sup> Takahiro Ishikawa,<sup>a</sup> Kana Matsudaira,<sup>b</sup> Maho Kitahara,<sup>b</sup> Yoshitane Imai<sup>†b</sup> and Takashi Tsuno<sup>\*a</sup>

<sup>a</sup> Department of Applied Molecular Chemistry, College of Industrial Technology, Nihon University, Narashino, Chiba 275-8575, Japan

<sup>b</sup> Department of Applied Chemistry, Faculty of Science and Engineering, Kindai University 3-4-1 Kowakae, Higashi-Osaka, Osaka 577-8502, Japan

#### **Table of Contents**

- 1. Instrumentation, Materials and Sample Preparation**
- 2. Synthetic Procedures and Characterization**
- 3. Single Crystal X-ray Diffraction Analysis**
- 4. Photophysical Properties**
- 5. Computational Details**
- 6. Cartesian Coordinates (in Å)**
- 7. References**

## 1. Instrumentation and Materials

### Instruments

Melting points were measured by a ATM-01 melting temperature measurement device (AS ONE Corporation). IR spectra were acquired with a JASCO FT/IR4100ST spectrometer. High-resolution mass spectrometry was recorded on Bruker micrOTOF II spectrometer. <sup>1</sup>H and <sup>13</sup>C NMR spectra were recorded on a Bruker Avance III 500 spectrometers, TMS as internal standard. Elemental analyses were performed on a J-SCIENCE MICRO CORDER JM10. UV–vis absorption spectra were obtained on a SHIMADZU UV-1900i spectrophotometer. CD spectra were recorded on JASCO J-720 and J-820 spectropolarimeter. Emission spectra were obtained on a JASCO FP-6500 spectrometer. CPL spectra were obtained at room temperature using a JASCO CPL-300 spectrofluoropolarimeter. Optical rotation was measured on a JASCO DIP-370 digital polarimeter.

### Materials and Sample Preparation

(*R*)- and (*S*)-1-phenylethylamine (Sigma Aldrich), 1-hydroxy-2-naphthaldehyde (TCI), Zinc Chloride (Kanto Chemical) and potassium *tert*-butoxide (Kanto Chemical) were obtained from commercial sources and were used without further purification. 4-Hydroxy-3-phenanthrenecarboxaldehyde was prepared by according publish procedure.<sup>S1</sup> The imine ligands were prepared by condensation of the corresponding aldehyde with (*R*)- and (*S*)-1-phenylethylamine in boiling ethanol. The solid-state samples were prepared according to the standard procedure for obtaining glassy KBr matrices.<sup>S2</sup>

## 2. Synthetic Procedures and Characterization

### General procedure for zinc complexes

A solution of corresponding chiral ligands (2 equiv.) in MeOH was added potassium *tert*-butoxide (2 equiv.) and ZnCl<sub>2</sub> (1 equiv.). The mixture was stirred at room temperature for overnight and yellow precipitate was formed. The residue was filtered, then recrystallized from CH<sub>2</sub>Cl<sub>2</sub>/EtOH resulting zinc complexes **1** and **2** as yellow crystals.

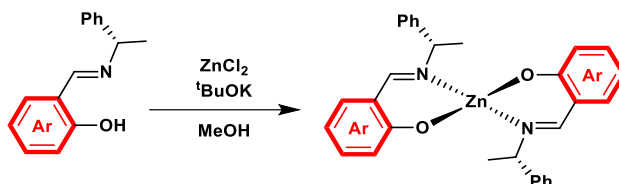

**Scheme. S1** Synthesis of chiral Schiff-base Zn(II) complexes studied in this work.

**(*S,S*)/(*R,R*)-1**: Yellow crystals (62%); m.p. 199–201 °C; IR (KBr): 1596 cm<sup>-1</sup> (N=C); HRMS (APCI+): *m/z* [M+H]<sup>+</sup> calcd for C<sub>38</sub>H<sub>33</sub>N<sub>2</sub>O<sub>2</sub>Zn: 613.1828; found: 613.1827; Anal. calcd for C<sub>38</sub>H<sub>32</sub>N<sub>2</sub>O<sub>2</sub>Zn: C, 74.33; H, 5.25; N, 4.56. Found: C, 74.45; H, 5.17; N, 4.57. (*S,S*)-**1**: [α]<sub>D</sub><sup>25</sup> = +246 (c 0.001, CHCl<sub>3</sub>), (*R,R*)-**1**: [α]<sub>D</sub><sup>25</sup> = -244 (c 0.001, CHCl<sub>3</sub>).

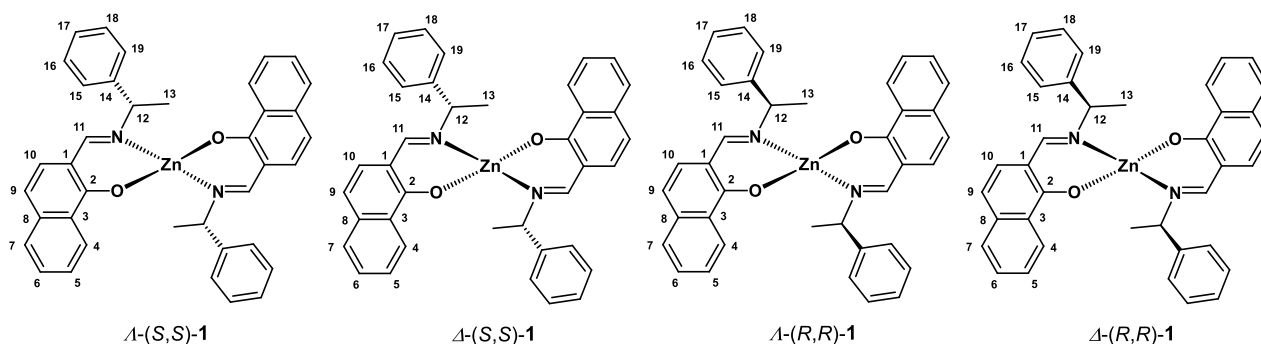

**Δ-(*S,S*)-1**: <sup>1</sup>H NMR (CDCl<sub>3</sub>, 500 MHz) δ 8.62 (d, *J* = 8.2 Hz, 2H, H<sup>4</sup>), 8.07 (br, 2H, H<sup>11</sup>), 7.68 (d, *J* = 8.2 Hz, 2H, H<sup>7</sup>), 7.54–7.50 (m, 2H, H<sup>6</sup>), 7.40–7.37 (m, 2H, H<sup>5</sup>), 7.07–7.05 (m, 4H, H<sup>10,17</sup>), 7.01 (d, *J* = 8.5 Hz, 2H, H<sup>9</sup>), 6.93–6.90 (m, 4H, H<sup>16,18</sup>), 6.79 (d, *J* = 7.3 Hz, 4H, H<sup>15,19</sup>), 4.25 (q, *J* = 6.6 Hz, 2H, H<sup>12</sup>), 1.51 (d, *J* = 6.6 Hz, 6H, H<sup>13</sup>); <sup>13</sup>C NMR (CDCl<sub>3</sub>, 125 MHz) δ 170.02, 167.93, 140.52, 137.38, 131.07, 130.56, 129.00, 128.45, 127.69, 127.44, 126.83, 126.27, 124.32, 113.92, 111.04, 69.21, 22.05.

**Δ-(*S,S*)-1**: <sup>1</sup>H NMR (CDCl<sub>3</sub>, 500 MHz) δ 8.55 (d, *J* = 8.2 Hz, 2H, H<sup>4</sup>), 8.31 (br, 2H, H<sup>11</sup>), 7.63 (d, *J* = 7.9 Hz, 2H, H<sup>7</sup>), 7.54–7.50 (m, 2H, H<sup>6</sup>), 7.40–7.37 (m, 6H, H<sup>5,15,19</sup>), 7.20–7.17 (m, 4H, H<sup>16,18</sup>), 7.14–7.11 (m, 2H, H<sup>17</sup>), 7.07–7.05 (m, 2H, H<sup>10</sup>), 6.96 (d, *J* = 8.8 Hz, 2H, H<sup>9</sup>), 4.63 (q, *J* = 6.6 Hz, 2H, H<sup>12</sup>), 1.55 (d, *J* = 6.6 Hz, 6H, H<sup>13</sup>); <sup>13</sup>C NMR (CDCl<sub>3</sub>, 125 MHz) δ 170.29, 170.02, 143.21, 137.44, 131.04, 130.43, 129.22, 128.71, 127.58, 127.44, 126.77, 126.50, 124.32, 114.11, 110.75, 68.10, 22.69.

**Δ-(*R,R*)-1**: <sup>1</sup>H NMR (CDCl<sub>3</sub>, 500 MHz) δ 8.62 (d, *J* = 8.2 Hz, 2H, H<sup>4</sup>), 8.08 (br, 2H, H<sup>11</sup>), 7.68 (d, *J* = 8.2 Hz, 2H, H<sup>7</sup>), 7.54–7.50 (m, 2H, H<sup>6</sup>), 7.40–7.37 (m, 2H, H<sup>5</sup>), 7.07–7.05 (m, 4H, H<sup>10,17</sup>), 7.01 (d, *J* = 8.5 Hz, 2H, H<sup>9</sup>), 6.93–6.90 (m, 4H, H<sup>16,18</sup>), 6.80 (d, *J* = 7.3 Hz, 4H, H<sup>15,19</sup>), 4.25 (q, *J* = 6.6 Hz, 2H, H<sup>12</sup>), 1.52 (d, *J* = 6.6 Hz, 6H, H<sup>13</sup>).

*A*-(*R,R*)-**1**:  $^1\text{H}$  NMR ( $\text{CDCl}_3$ , 500 MHz)  $\delta$  8.55 (d,  $J = 8.2$  Hz, 2H,  $\text{H}^4$ ), 8.31 (br, 2H,  $\text{H}^{11}$ ), 7.63 (d,  $J = 7.9$  Hz, 2H,  $\text{H}^7$ ), 7.54–7.50 (m, 2H,  $\text{H}^6$ ), 7.40–7.37 (m, 6H,  $\text{H}^{5,15,19}$ ), 7.20–7.17 (m, 4H,  $\text{H}^{16,18}$ ), 7.14–7.11 (m, 2H,  $\text{H}^{17}$ ), 7.07–7.05 (m, 2H,  $\text{H}^{10}$ ), 6.96 (d,  $J = 8.8$  Hz, 2H,  $\text{H}^9$ ), 4.64 (q,  $J = 6.6$  Hz, 2H,  $\text{H}^{12}$ ), 1.55 (d,  $J = 6.6$  Hz, 6H,  $\text{H}^{13}$ ).

**(*S,S*)/(*R,R*)-2**: Yellow crystals (83%); m.p. 237–239 °C; IR (KBr): 1612, 1581  $\text{cm}^{-1}$  (N=C); HRMS (APCI+):  $m/z$  [M+H] $^+$  calcd for  $\text{C}_{46}\text{H}_{37}\text{N}_2\text{O}_2\text{Zn}$ : 713.2141; found: 713.2127; Anal. calcd for  $\text{C}_{46}\text{H}_{36}\text{N}_2\text{O}_2\text{Zn}$ : C, 77.36; H, 5.08; N, 3.92. Found: C, 77.30; H, 4.98; N, 3.83. (*S,S*)-**2**:  $[\alpha]_{\text{D}}^{25} = +273$  (c 0.001,  $\text{CHCl}_3$ ) (*R,R*)-**1**:  $[\alpha]_{\text{D}}^{25} = -273$  (c 0.001,  $\text{CHCl}_3$ ).

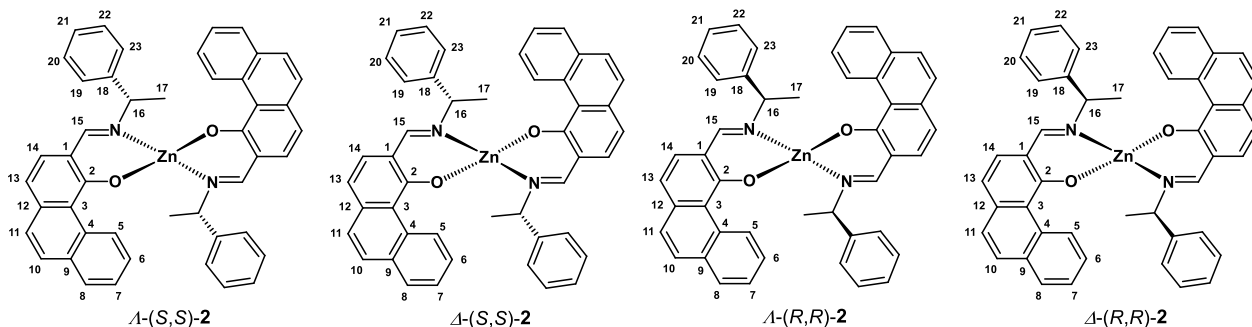

*A*-(*S,S*)-**2**:  $^1\text{H}$  NMR ( $\text{CDCl}_3$ , 500 MHz)  $\delta$  10.56 (d,  $J = 8.9$  Hz, 2H,  $\text{H}^5$ ), 8.19 (br, 2H,  $\text{H}^{15}$ ), 7.89–7.82 (m, 4H,  $\text{H}^{8,10}$ ), 7.68 (d,  $J = 8.5$  Hz, 2H,  $\text{H}^{11}$ ), 7.61–7.50 (m, 4H,  $\text{H}^{6,7}$ ), 7.26 (d,  $J = 8.5$  Hz, 2H,  $\text{H}^{14}$ ), 7.18 (d,  $J = 8.5$  Hz, 2H,  $\text{H}^{13}$ ), 7.06–7.02 (m, 2H,  $\text{H}^{21}$ ), 6.90–6.86 (m, 4H,  $\text{H}^{20,22}$ ), 6.82–6.79 (m, 4H,  $\text{H}^{19,23}$ ), 4.30 (q,  $J = 6.7$  Hz, 2H,  $\text{H}^{16}$ ), 1.48 (d,  $J = 6.7$  Hz, 6H,  $\text{H}^{17}$ );  $^{13}\text{C}$  NMR ( $\text{CDCl}_3$ , 125 MHz)  $\delta$  172.58, 168.88, 140.24, 138.52, 133.01, 133.00, 132.27, 130.83, 129.06, 128.44, 128.02, 127.50, 127.16, 126.92, 126.80, 125.25, 123.88, 115.46, 115.18, 69.52, 22.11.

*A*-(*S,S*)-**2**:  $^1\text{H}$  NMR ( $\text{CDCl}_3$ , 500 MHz)  $\delta$  10.44 (d,  $J = 8.5$  Hz, 2H,  $\text{H}^5$ ), 8.42 (br, 2H,  $\text{H}^{15}$ ), 7.89–7.82 (m, 4H,  $\text{H}^{8,10}$ ), 7.63 (d,  $J = 8.9$  Hz, 2H,  $\text{H}^{11}$ ), 7.61–7.50 (m, 4H,  $\text{H}^{6,7}$ ), 7.33–7.31 (m, 4H,  $\text{H}^{19,23}$ ), 7.25 (d,  $J = 8.2$  Hz, 2H,  $\text{H}^{14}$ ), 7.12 (d,  $J = 8.2$  Hz, 2H,  $\text{H}^{13}$ ), 6.93–6.86 (m, 6H,  $\text{H}^{20,21,22}$ ), 4.66 (q,  $J = 6.5$  Hz, 2H,  $\text{H}^{16}$ ), 1.58 (d,  $J = 6.5$  Hz, 6H,  $\text{H}^{17}$ );  $^{13}\text{C}$  NMR ( $\text{CDCl}_3$ , 125 MHz)  $\delta$  172.71, 171.19, 143.04, 138.65, 133.14, 132.90, 132.28, 131.06, 129.19, 128.72, 127.96, 172.81, 127.34, 126.97, 126.48, 125.25, 123.99, 115.33, 115.09, 68.22, 22.64.

*A*-(*R,R*)-**2**:  $^1\text{H}$  NMR ( $\text{CDCl}_3$ , 500 MHz)  $\delta$  10.56 (d,  $J = 8.9$  Hz, 2H,  $\text{H}^5$ ), 8.20 (br, 2H,  $\text{H}^{15}$ ), 7.89–7.82 (m, 4H,  $\text{H}^{8,10}$ ), 7.68 (d,  $J = 8.5$  Hz, 2H,  $\text{H}^{11}$ ), 7.61–7.50 (m, 4H,  $\text{H}^{6,7}$ ), 7.26 (d,  $J = 8.5$  Hz, 2H,  $\text{H}^{14}$ ), 7.17 (d,  $J = 8.5$  Hz, 2H,  $\text{H}^{13}$ ), 7.06–7.02 (m, 2H,  $\text{H}^{21}$ ), 6.90–6.86 (m, 4H,  $\text{H}^{20,22}$ ), 6.82–6.79 (m, 4H,  $\text{H}^{19,23}$ ), 4.31 (q,  $J = 6.7$  Hz, 2H,  $\text{H}^{16}$ ), 1.48 (d,  $J = 6.7$  Hz, 6H,  $\text{H}^{17}$ ).

*A*-(*R,R*)-**2**:  $^1\text{H}$  NMR ( $\text{CDCl}_3$ , 500 MHz)  $\delta$  10.44 (d,  $J = 8.5$  Hz, 2H,  $\text{H}^5$ ), 8.43 (br, 2H,  $\text{H}^{15}$ ), 7.89–7.82 (m, 4H,  $\text{H}^{8,10}$ ), 7.63 (d,  $J = 8.9$  Hz, 2H,  $\text{H}^{11}$ ), 7.61–7.50 (m, 4H,  $\text{H}^{6,7}$ ), 7.33–7.31 (m, 4H,  $\text{H}^{19,23}$ ), 7.25 (d,  $J = 8.2$  Hz, 2H,  $\text{H}^{14}$ ), 7.12 (d,  $J = 8.2$  Hz, 2H,  $\text{H}^{13}$ ), 6.93–6.86 (m, 6H,  $\text{H}^{20,21,22}$ ), 4.67 (q,  $J = 6.5$  Hz, 2H,  $\text{H}^{16}$ ), 1.58 (d,  $J = 6.5$  Hz, 6H,  $\text{H}^{17}$ ).

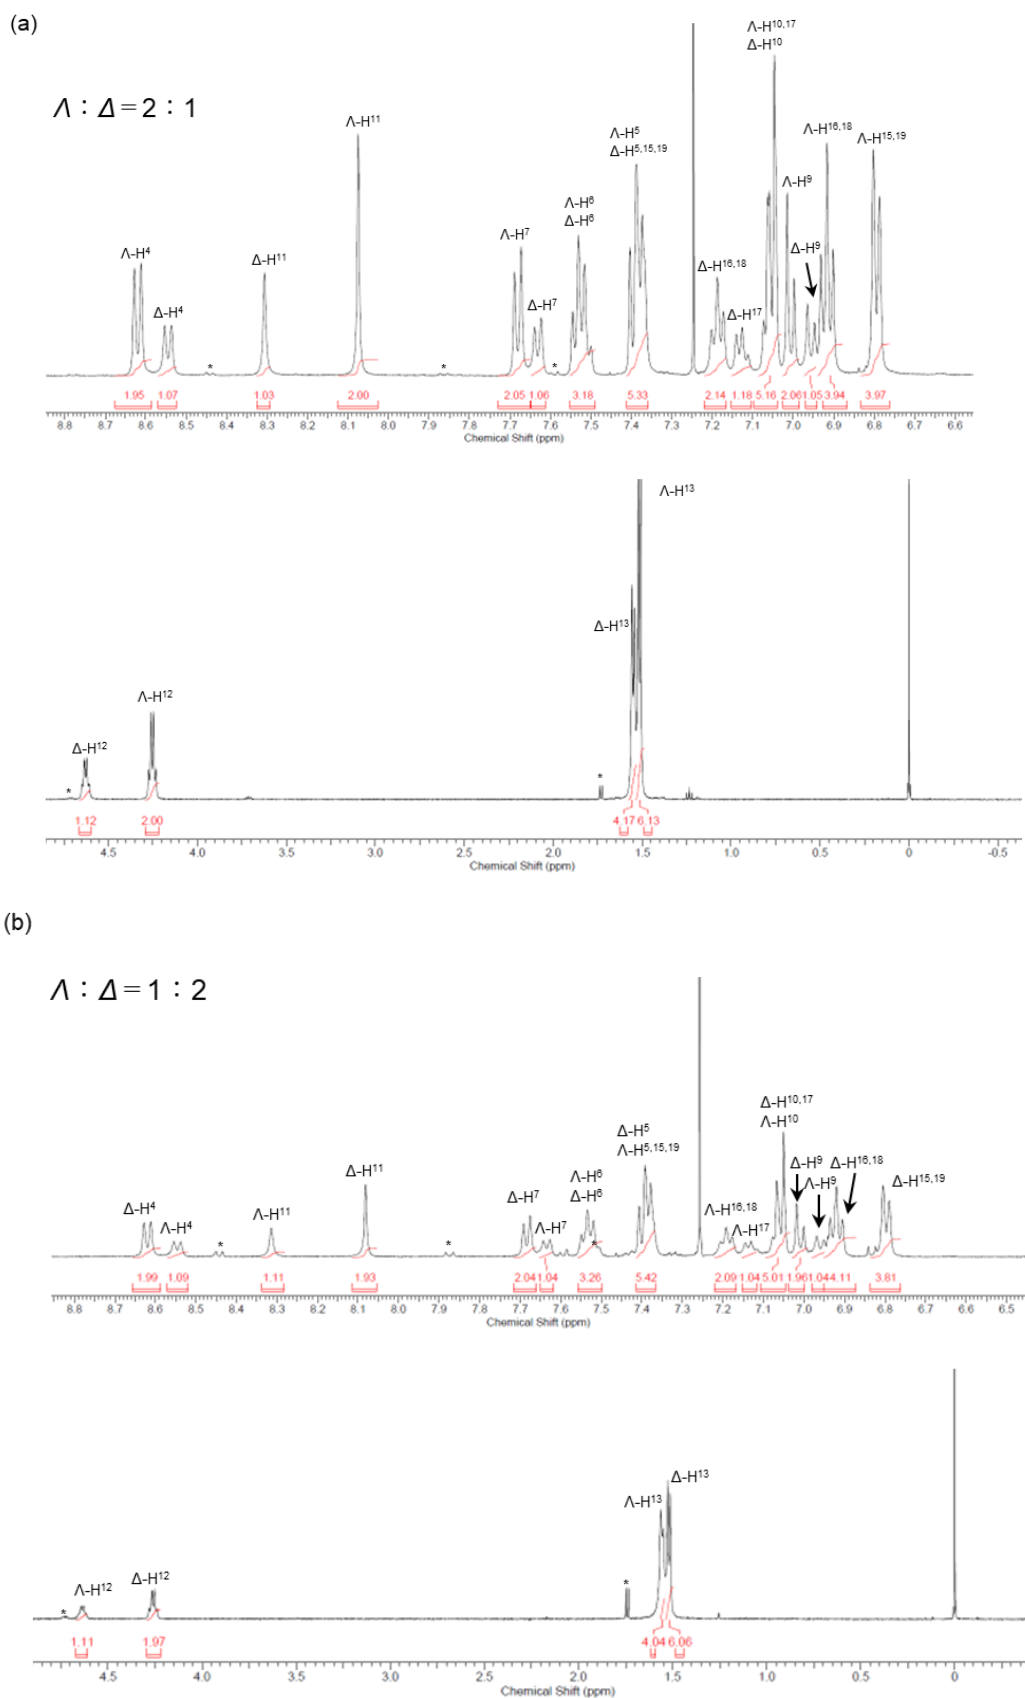

**Fig. S1**  $^1\text{H}$  NMR spectra of (a) (*S,S*)-**1** and (b) (*R,R*)-**1** in  $\text{CDCl}_3$  (500 MHz, 298 K). Asterisked peaks correspond to the free ligand in the sample.

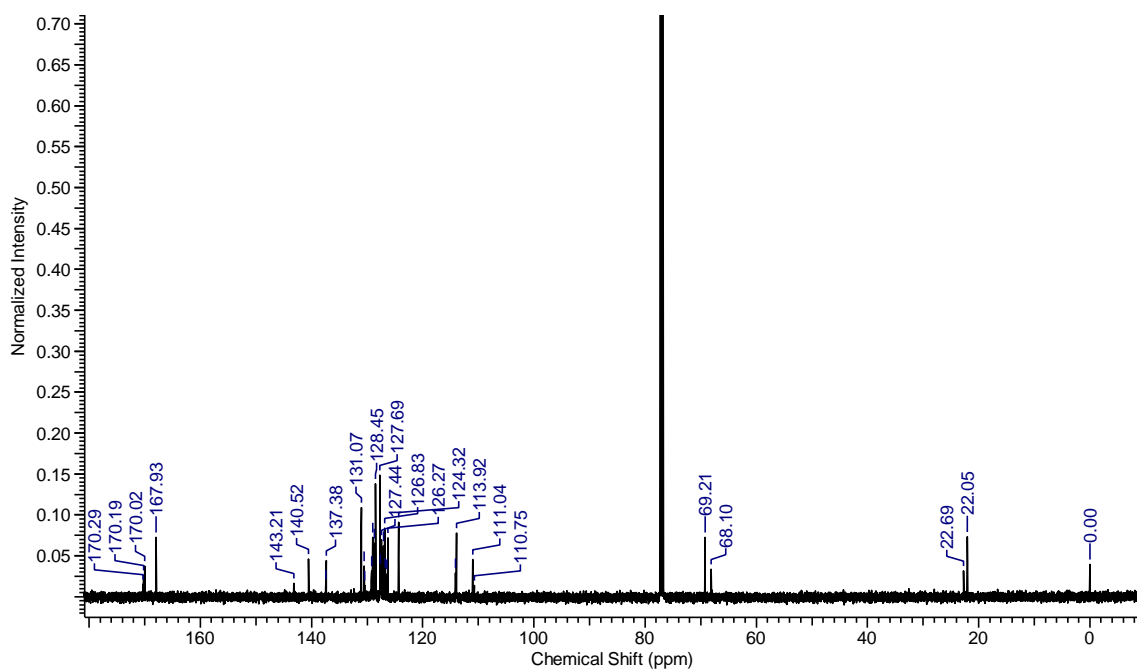

**Fig. S2**  $^{13}\text{C}$  NMR spectrum of (*S,S*)-**1** in  $\text{CDCl}_3$  (125 MHz, 298 K).

$\Lambda : \Delta = 2 : 1.3$

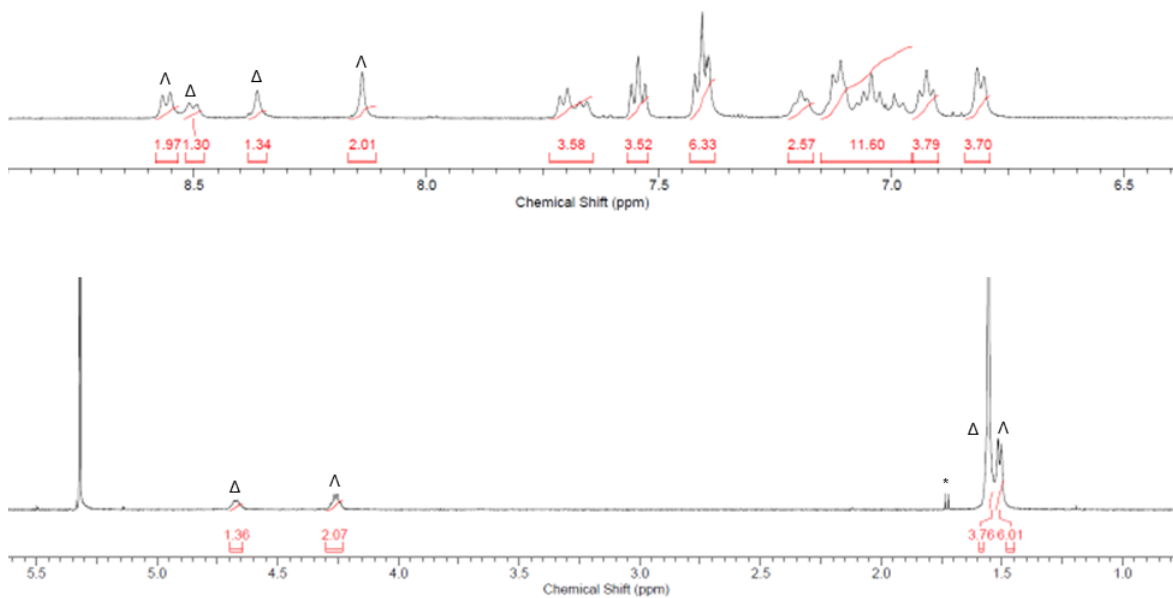

**Fig. S3**  $^1\text{H}$  NMR spectrum of (*S,S*)-**1** in  $\text{CD}_2\text{Cl}_2$  (500 MHz, 298 K).

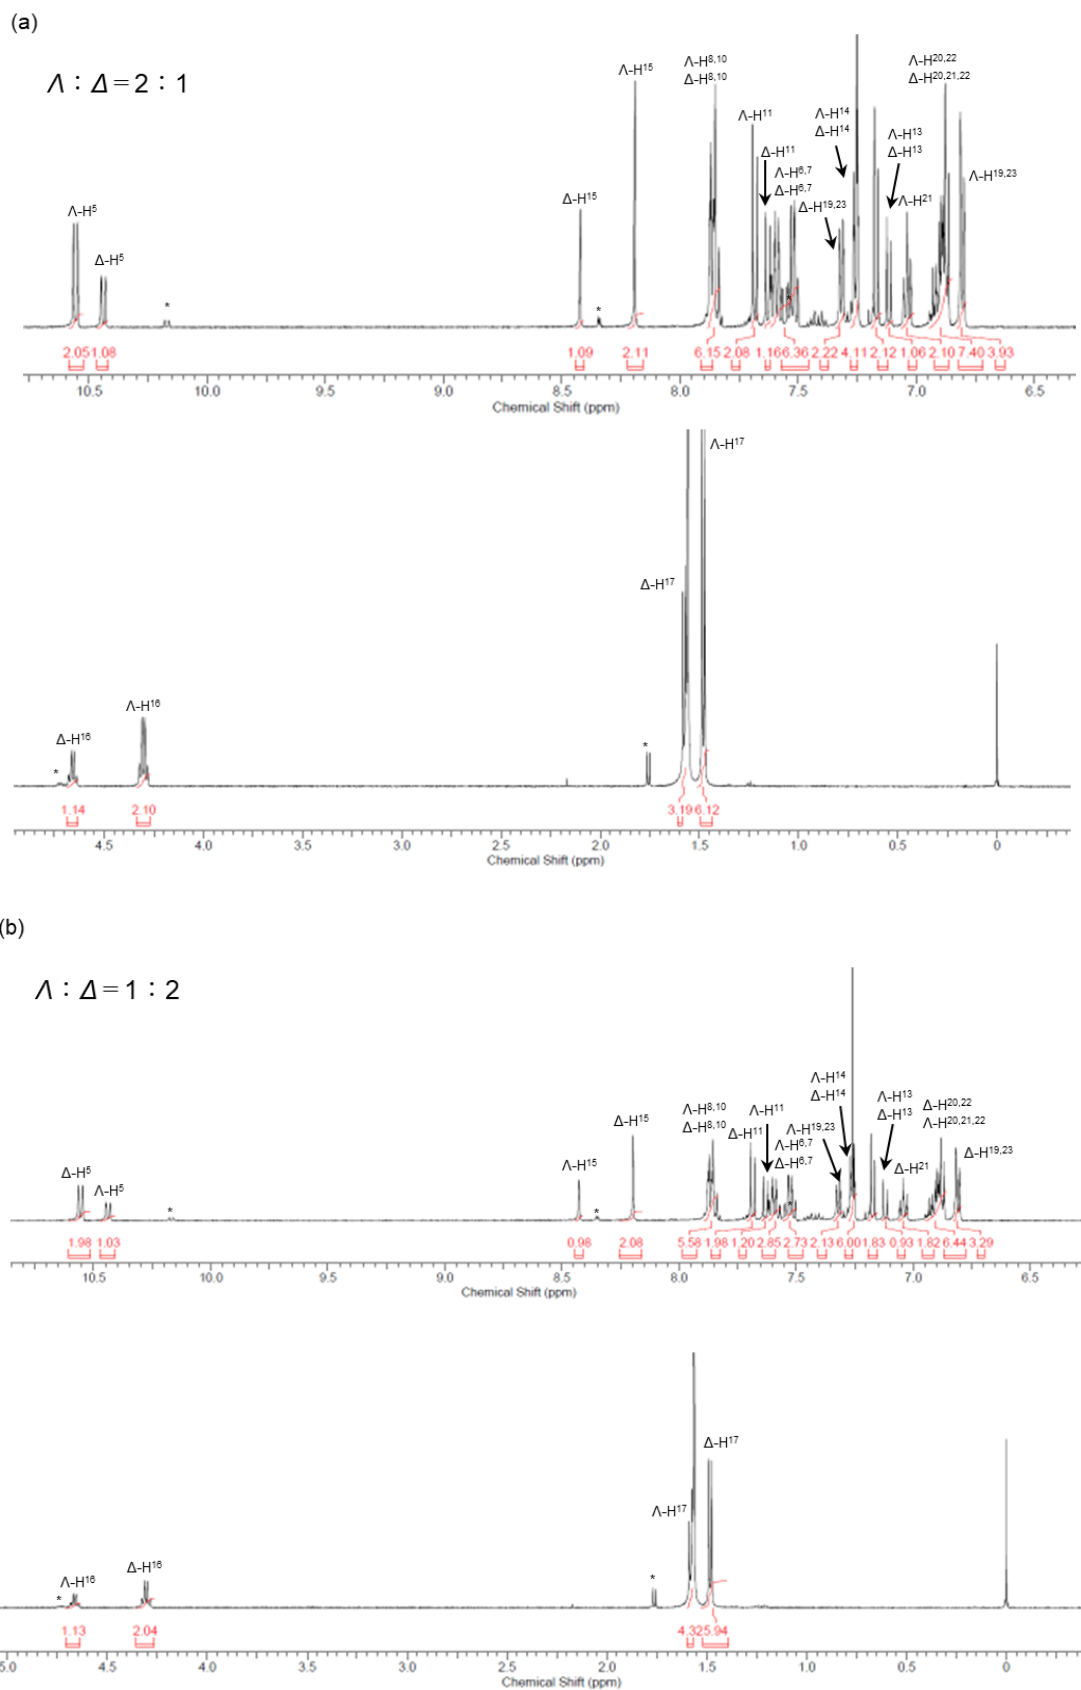

**Fig. S4**  $^1\text{H}$  NMR spectra of (a) (*S,S*)-**2** and (b) (*R,R*)-**2** in  $\text{CDCl}_3$  (500 MHz, 298 K). Asterisked peaks correspond to the free ligand in the sample.

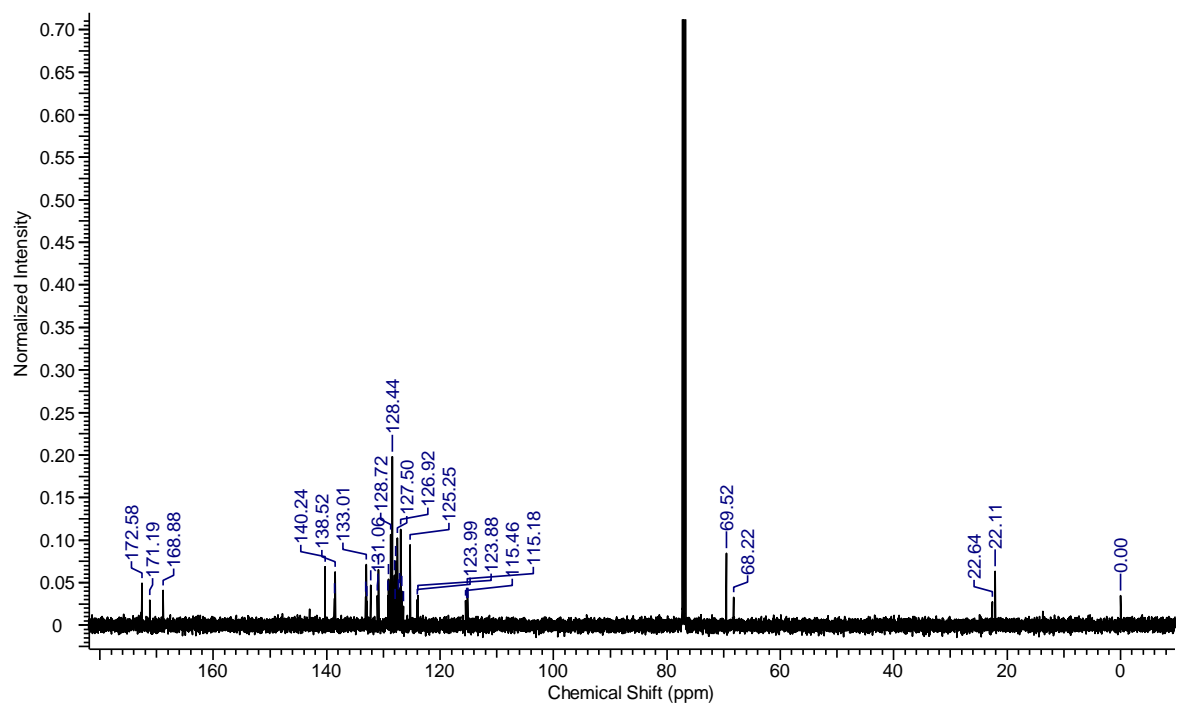

**Fig. S5**  $^{13}\text{C}$  NMR spectrum of (*S,S*)-**2** in  $\text{CDCl}_3$  (125 MHz, 298 K).

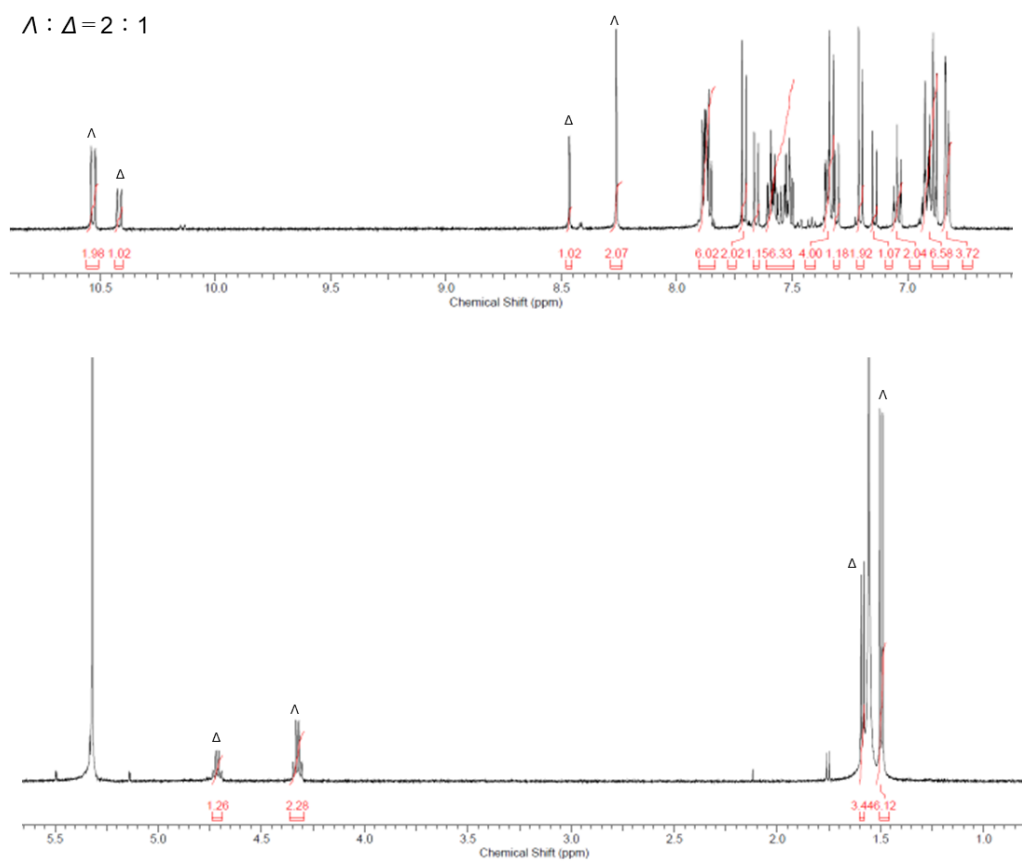

**Fig. S6**  $^1\text{H}$  NMR spectrum of (*S,S*)-**2** in  $\text{CD}_2\text{Cl}_2$  (500 MHz, 298 K).



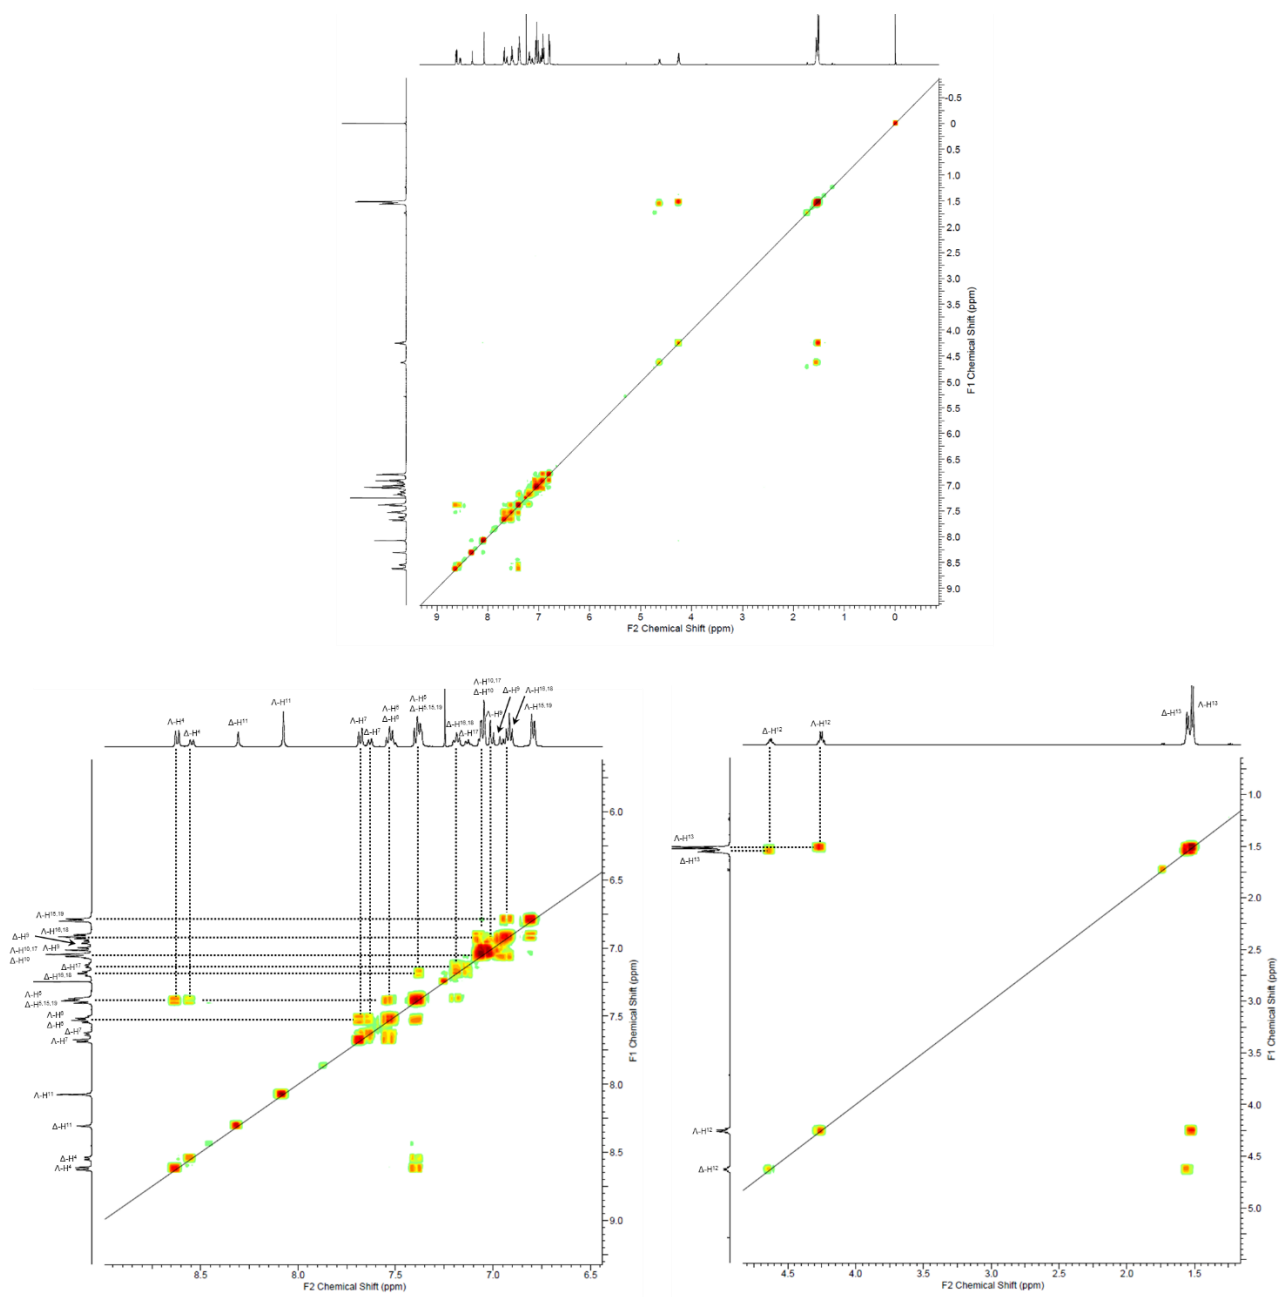

**Fig. S7** gCOSY spectra of (*S,S*)-**1** in  $\text{CDCl}_3$  (500 MHz, 298 K). Whole spectrum (upper) and enlarged spectra (lower).

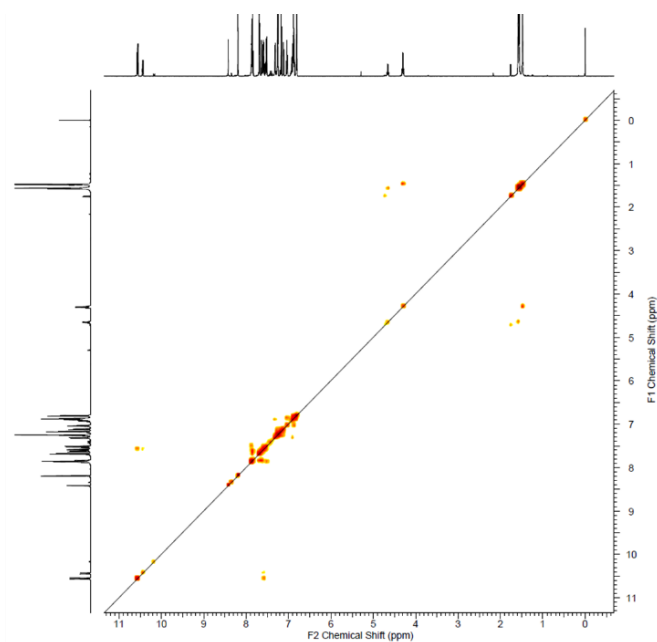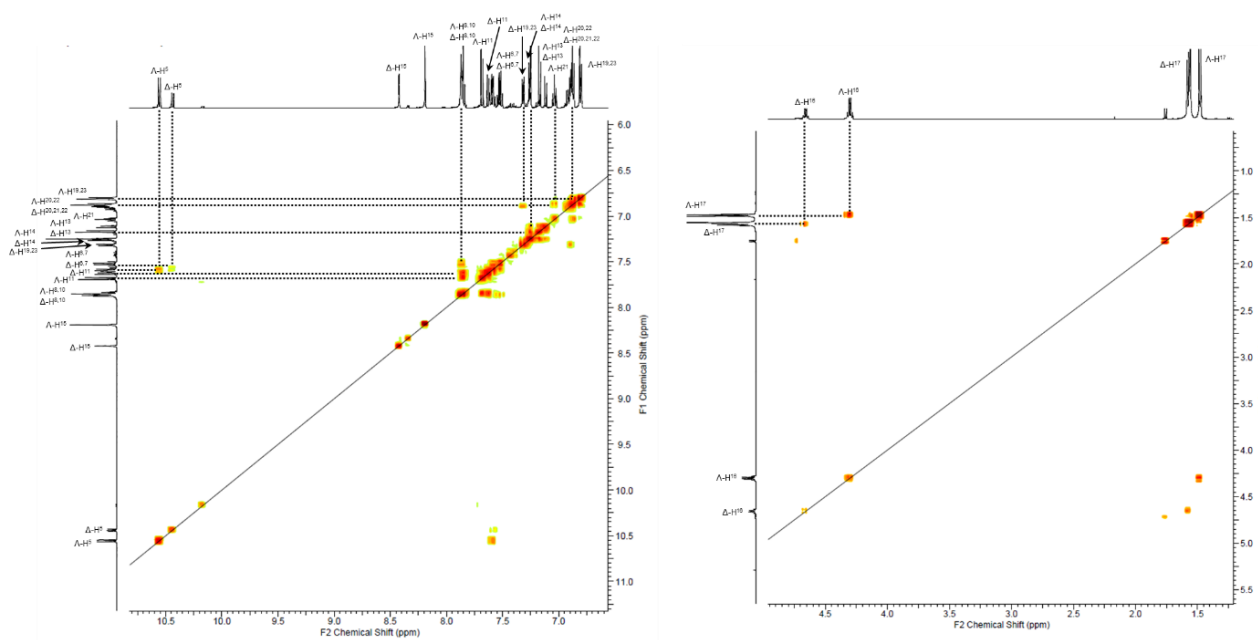

**Fig. S8** gCOSY spectra of (*S,S*)-**2** in  $\text{CDCl}_3$  (500 MHz, 298 K). Whole spectrum (upper) and enlarged spectra (lower).

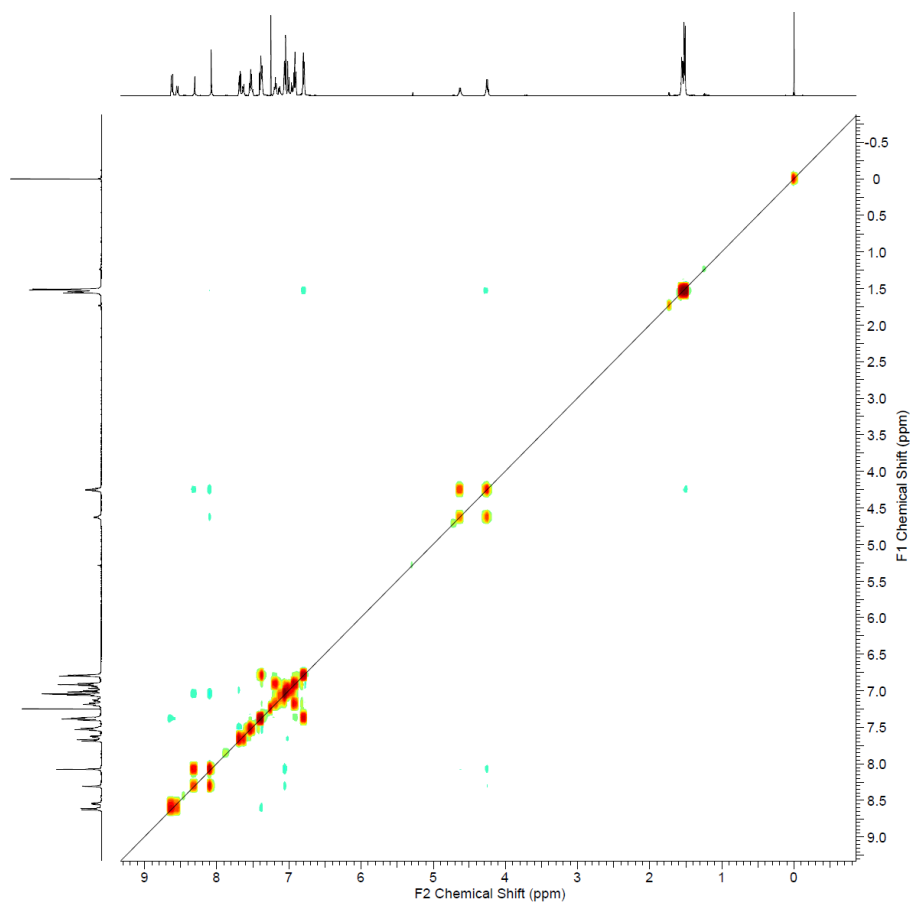

**Fig. S9** NOESY spectrum of (*S,S*)-**1** in  $\text{CDCl}_3$  (500 MHz, 298 K).

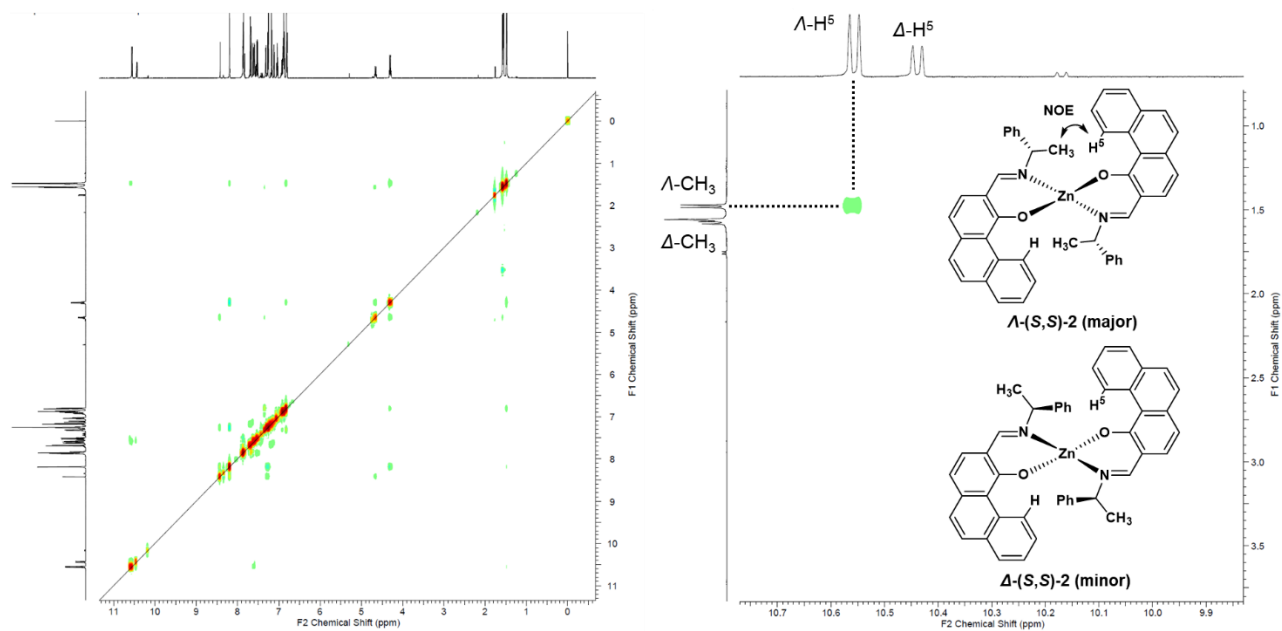

**Fig. S10** NOESY spectra of (*S,S*)-**2** in  $\text{CDCl}_3$  (500 MHz, 298 K). Whole spectrum (left) and enlarged spectrum (right).

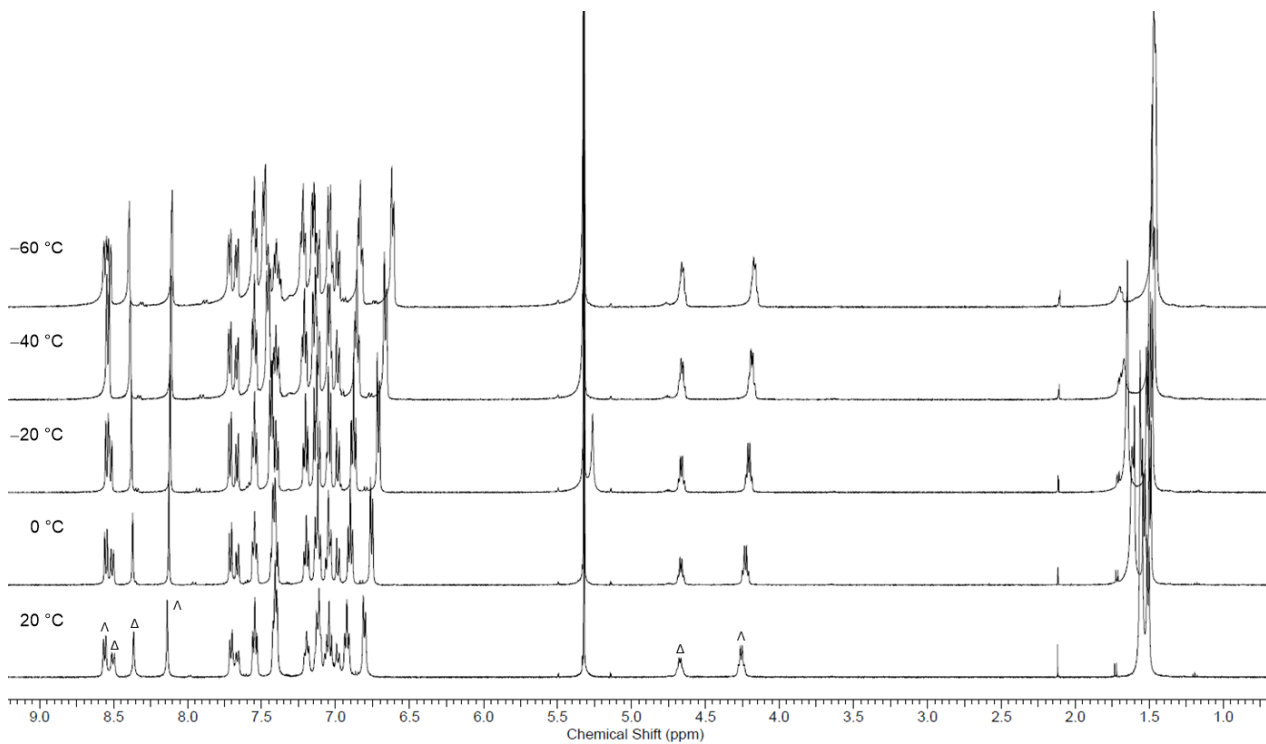

**Fig. S11**  $^1\text{H}$  NMR spectra of (*S,S*)-**1** in  $\text{CD}_2\text{Cl}_2$  (500 MHz) at variable temperature.

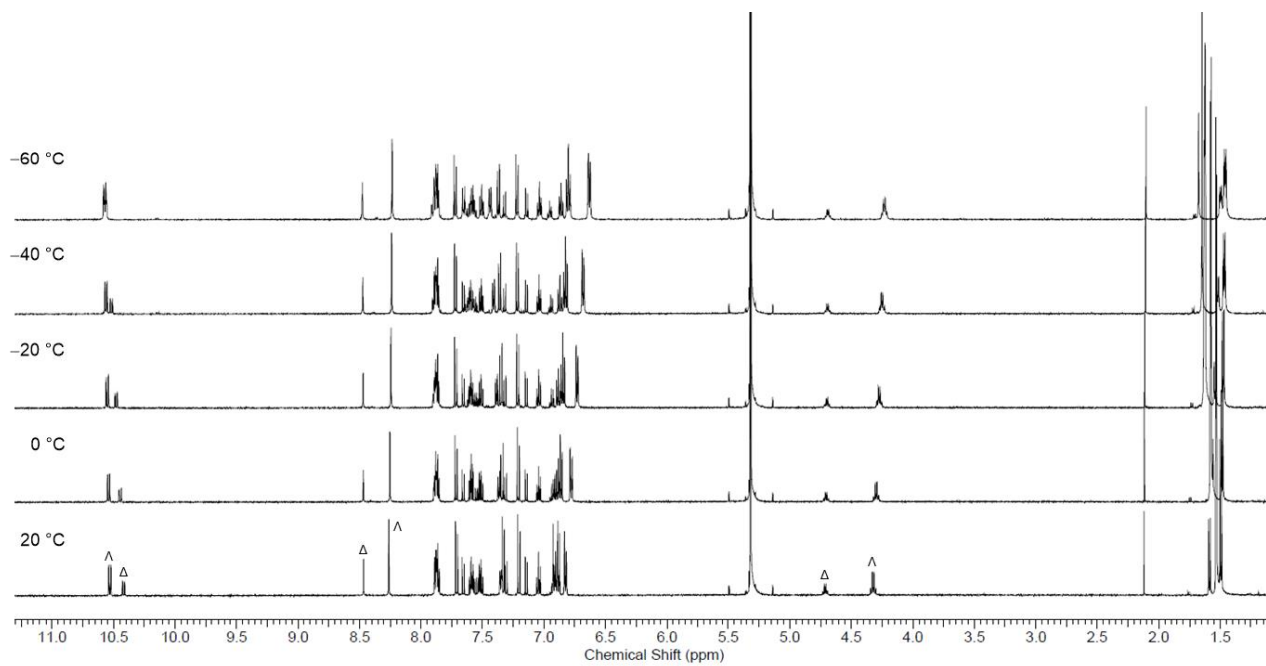

**Fig. S12**  $^1\text{H}$  NMR spectra of (*S,S*)-**2** in  $\text{CD}_2\text{Cl}_2$  (500 MHz) at variable temperature.

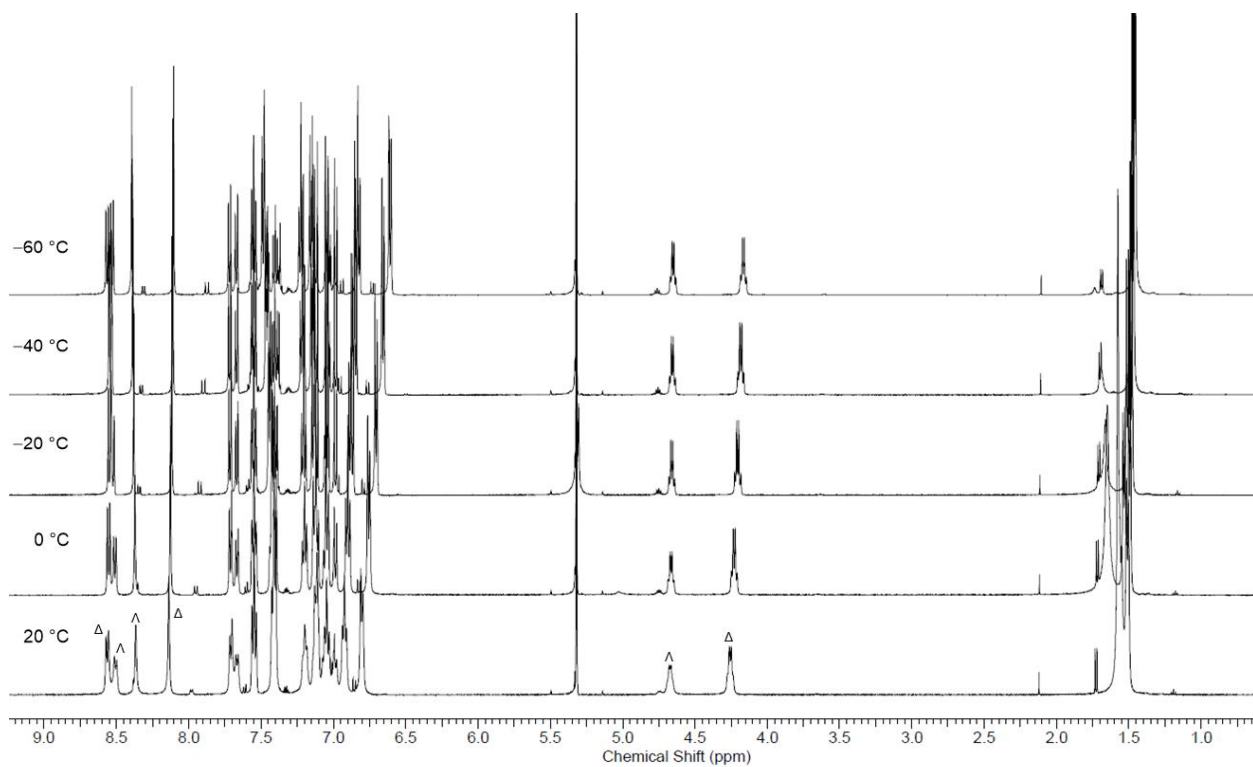

**Fig. S13**  $^1\text{H}$  NMR spectra of  $(R,R)$ -1 in  $\text{CD}_2\text{Cl}_2$  (500 MHz) at variable temperature.

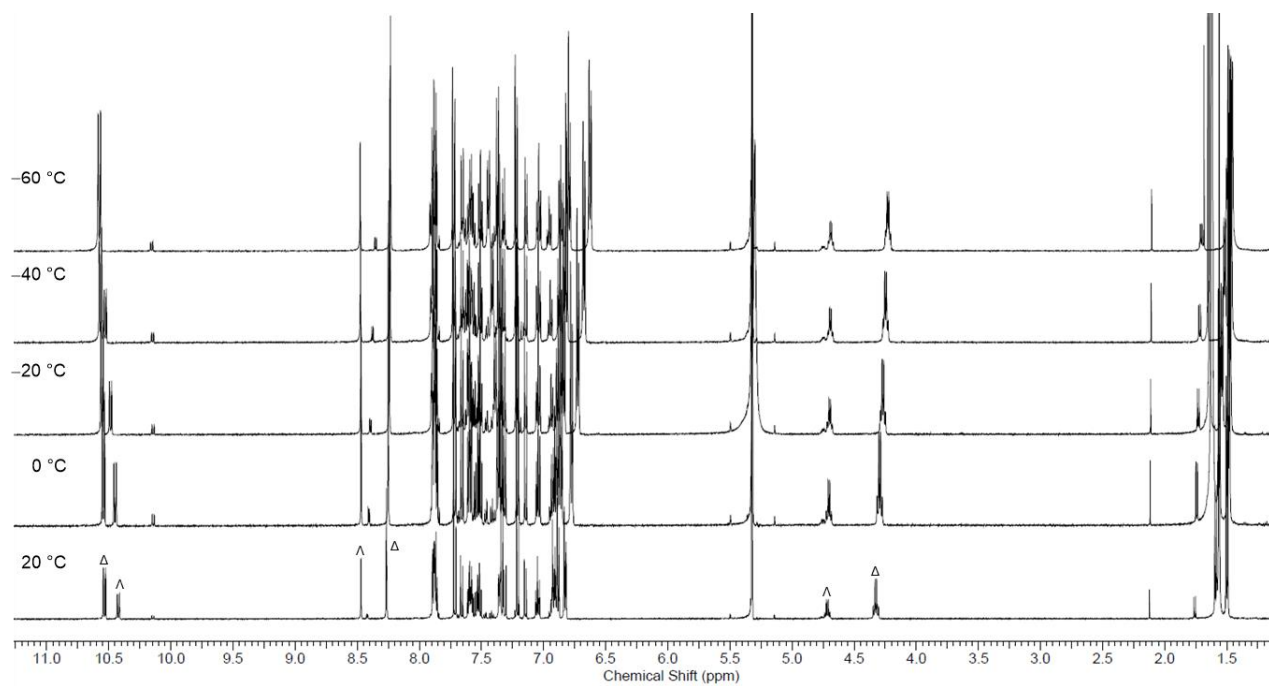

**Fig. S14**  $^1\text{H}$  NMR spectra of  $(R,R)$ -2 in  $\text{CD}_2\text{Cl}_2$  (500 MHz) at variable temperature.

### 3. Single Crystal X-ray Diffraction Analysis

Crystals suitable for XRD studies were analyzed using Rigaku RAXIS-RAPID imaging plate diffractometer using Mo- $K_{\alpha}$  radiation (graphite monochromated,  $\lambda = 0.71073 \text{ \AA}$ , fine focus tube,  $\omega$ -scan) and Rigaku XtaLAB mini2 benchtop X-ray crystallography system equipped with a Mo rotating-anode X-ray generator with monochromated Mo- $K_{\alpha}$  radiation ( $\lambda = 0.71073 \text{ \AA}$ ). The molecular structures and packings in crystals  $\Delta$ -(*S,S*)-**1**,  $\Delta$ -(*R,R*)-**1**,  $\Delta$ -(*S,S*)-**2** and  $\Delta$ -(*R,R*)-**2** were solved by direct methods and refined using the full-matrix least-squares method. In subsequent refinements, the function  $\Sigma\omega(F_o^2 - F_c^2)^2$  was minimized, where  $F_o$  and  $F_c$  are the observed and calculated structure factor amplitudes, respectively. The positions of non-hydrogen atoms were found from difference Fourier electron density maps and refined anisotropically. All calculations were performed using the Crystal Structure crystallographic or CrysAlisPro program software package, and illustrations were drawn by using ORTEP.

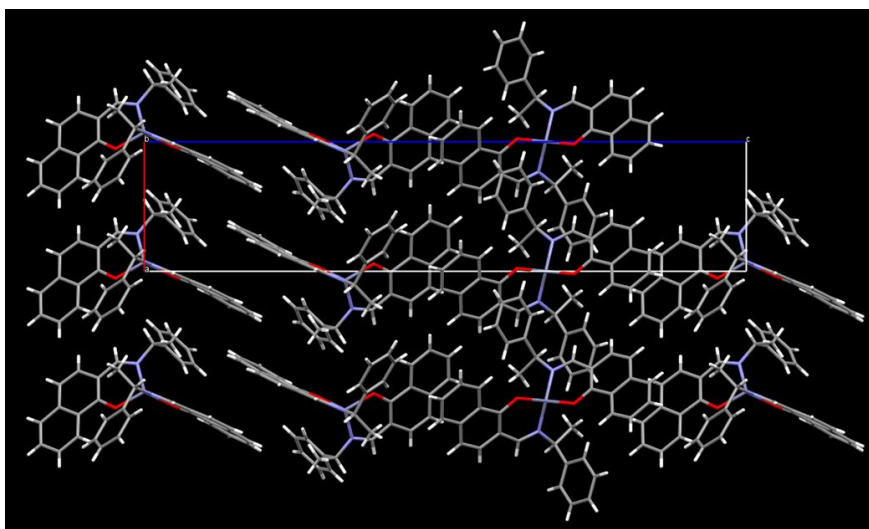

**Fig. S15** The *b*-axis projections of packing structure of  $\Delta$ -(*S,S*)-**1**.

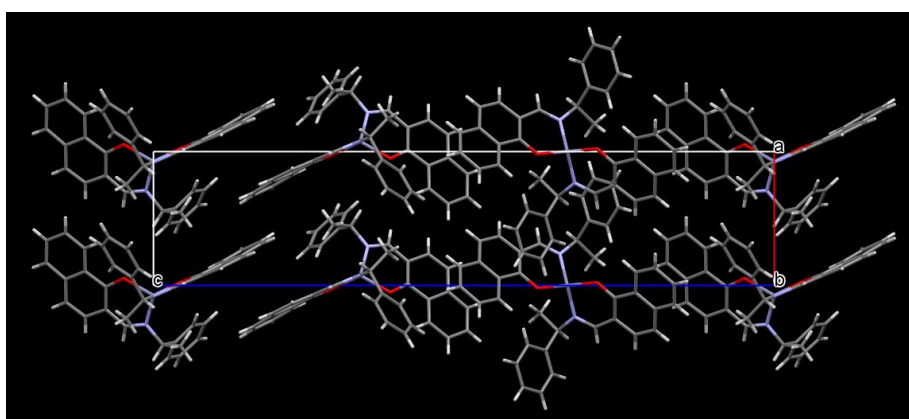

**Fig. S16** The *b*-axis projections of packing structure of  $\Delta$ -(*R,R*)-**1**.

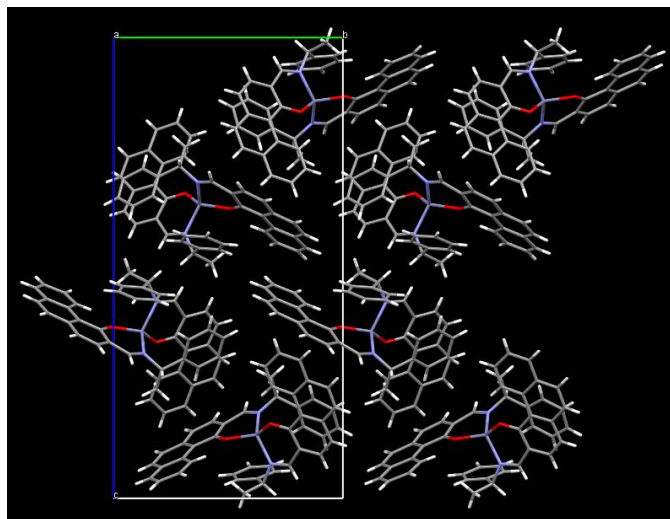

**Fig. S17** The *c*-axis projections of packing structure of *A*-(*S,S*)-**2**.

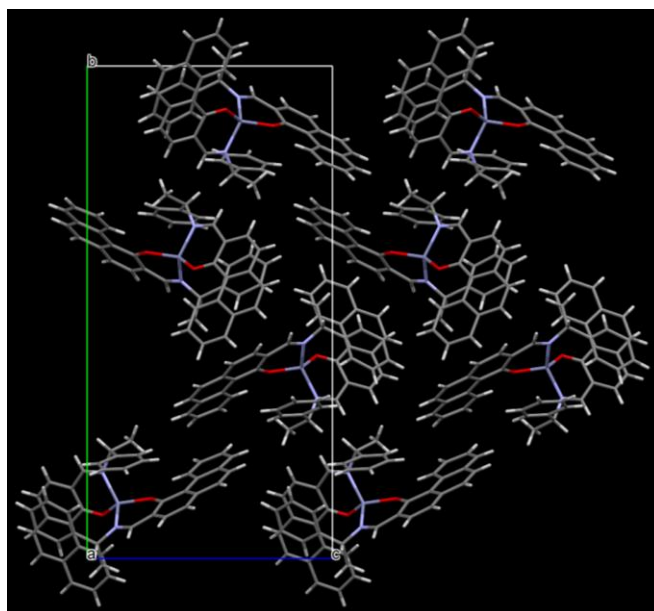

**Fig. S18** The *a*-axis projections of packing structure of *A*-(*R,R*)-**2**.

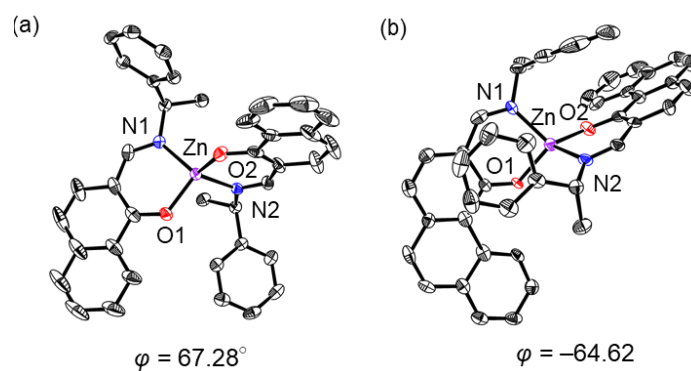

**Fig. S19** ORTEP drawings of (a) *A*-(*R,R*)-**1** and (b) *A*-(*R,R*)-**2**. Thermal ellipsoids are shown at 50% probability level. Hydrogen atoms are omitted for clarity. The dihedral angles of tetrahedral geometry O(1)–N(1)–O(2)–N(2) ( $\varphi$ ) are given under each structure.

**Table S1.** Crystal data and structural refinement details for complexes *A*-(*S,S*)-**1**, *A*-(*R,R*)-**1**, *A*-(*S,S*)-**2** and *A*-(*S,S*)-**2**.

|                                                                   | <i>A</i> -( <i>S,S</i> )- <b>1</b>                               | <i>A</i> -( <i>R,R</i> )- <b>1</b>                               | <i>A</i> -( <i>S,S</i> )- <b>2</b>                               | <i>A</i> -( <i>R,R</i> )- <b>2</b>                               |
|-------------------------------------------------------------------|------------------------------------------------------------------|------------------------------------------------------------------|------------------------------------------------------------------|------------------------------------------------------------------|
| Formula                                                           | C <sub>38</sub> H <sub>32</sub> N <sub>2</sub> O <sub>2</sub> Zn | C <sub>38</sub> H <sub>32</sub> N <sub>2</sub> O <sub>2</sub> Zn | C <sub>46</sub> H <sub>36</sub> N <sub>2</sub> O <sub>2</sub> Zn | C <sub>46</sub> H <sub>36</sub> N <sub>2</sub> O <sub>2</sub> Zn |
| <i>M</i> <sub>F</sub>                                             | 614.085                                                          | 614.085                                                          | 714.206                                                          | 714.206                                                          |
| <i>T</i> [K]                                                      | 173.15                                                           | 113.15                                                           | 173.15                                                           | 173.15                                                           |
| Crystal color, habit                                              | yellow, plate                                                    | yellow, plate                                                    | yellow, plate                                                    | yellow, plate                                                    |
| Crystal size [mm]                                                 | 0.283×0.154×0.123                                                | 0.330×0.264×0.183                                                | 0.215×0.086×0.068                                                | 0.215×0.086×0.068                                                |
| Crystal system                                                    | trigonal                                                         | trigonal                                                         | orthorhombic                                                     | orthorhombic                                                     |
| Space group                                                       | <i>P</i> 3 <sub>1</sub> 21 (#152)                                | <i>P</i> 3 <sub>2</sub> 21 (#154)                                | <i>P</i> 2 <sub>1</sub> 2 <sub>1</sub> 2 <sub>1</sub> (#19)      | <i>P</i> 2 <sub>1</sub> 2 <sub>1</sub> 2 <sub>1</sub> (#19)      |
| <i>a</i> [Å]                                                      | 8.6360(5)                                                        | 8.6028(2)                                                        | 8.6130(5)                                                        | 8.6225(9)                                                        |
| <i>b</i> [Å]                                                      | 8.6360(5)                                                        | 8.6028(2)                                                        | 14.1657(8)                                                       | 28.466(2)                                                        |
| <i>c</i> [Å]                                                      | 34.785(2)                                                        | 34.6337(8)                                                       | 28.4939(15)                                                      | 14.1674(11)                                                      |
| <i>α</i> [°]                                                      | 90                                                               | 90                                                               | 90                                                               | 90                                                               |
| <i>β</i> [°]                                                      | 90                                                               | 90                                                               | 90                                                               | 90                                                               |
| <i>γ</i> [°]                                                      | 120                                                              | 120                                                              | 90                                                               | 90                                                               |
| <i>V</i> [Å <sup>3</sup> ]                                        | 2246.7(2)                                                        | 2219.78(12)                                                      | 3476.5(3)                                                        | 3477.4(5)                                                        |
| <i>Z</i>                                                          | 3                                                                | 3                                                                | 4                                                                | 4                                                                |
| <i>D</i> <sub>calcd</sub> [g cm <sup>-3</sup> ]                   | 1.362                                                            | 1.378                                                            | 1.365                                                            | 1.364                                                            |
| Abs coeff (mm <sup>-1</sup> )                                     | 0.858                                                            | 0.868                                                            | 0.750                                                            | 0.749                                                            |
| Abs correct                                                       | multi-scan                                                       | multi-scan                                                       | multi-scan                                                       | multi-scan                                                       |
| Transmiss max/min                                                 | 1.0000/0.87065                                                   | 1.0000/0.91994                                                   | 1.0000/0.73360                                                   | 1.0000/0.70332                                                   |
| <i>F</i> (000)                                                    | 961.5                                                            | 960.0                                                            | 1490.2                                                           | 1488.0                                                           |
| <i>θ</i> range (°)                                                | 5.44–51.98                                                       | 5.468–60.946                                                     | 4.06–50                                                          | 4.056–60.942                                                     |
| Rflns/unique                                                      | 10148/2858                                                       | 30053/4401                                                       | 33792/6125                                                       | 31897/10053                                                      |
| <i>R</i> <sub>int</sub>                                           | 0.0351                                                           | 0.0412                                                           | 0.0792                                                           | 0.1916                                                           |
| Data/params                                                       | 2858/310/305                                                     | 4401/0/196                                                       | 6125/0/462                                                       | 10053/7/462                                                      |
| Largest diff. peak and hole (e Å <sup>-3</sup> )                  | 0.62/−0.49                                                       | 0.34/−0.78                                                       | 0.81/−0.55                                                       | 0.94/−0.70                                                       |
| <i>R</i> <sub>1</sub> ( <i>I</i> > 2σ( <i>I</i> )) <sup>[a]</sup> | 0.0366                                                           | 0.0390                                                           | 0.0509                                                           | 0.1377                                                           |
| w <i>R</i> <sub>2</sub> (all reflections) <sup>[b]</sup>          | 0.0595                                                           | 0.0711                                                           | 0.0908                                                           | 0.1399                                                           |
| Goodness of fit                                                   | 1.067                                                            | 1.095                                                            | 1.054                                                            | 1.011                                                            |
| Flack Parameter                                                   | 0.002(7)                                                         | −0.007(4)                                                        | 0.001(7)                                                         | −0.04(2)                                                         |
| CCDC No.                                                          | 2159108                                                          | 2174594                                                          | 2159109                                                          | 2174595                                                          |

[a]  $R_1 = \Sigma(|F_o| - |F_c|) / \Sigma(|F_o|)$ . [b]  $wR_2 = [\Sigma(w(F_o^2 - F_c^2)^2) / \Sigma(wF_o^2)]^{1/2}$ .



## 4. Photophysical Properties

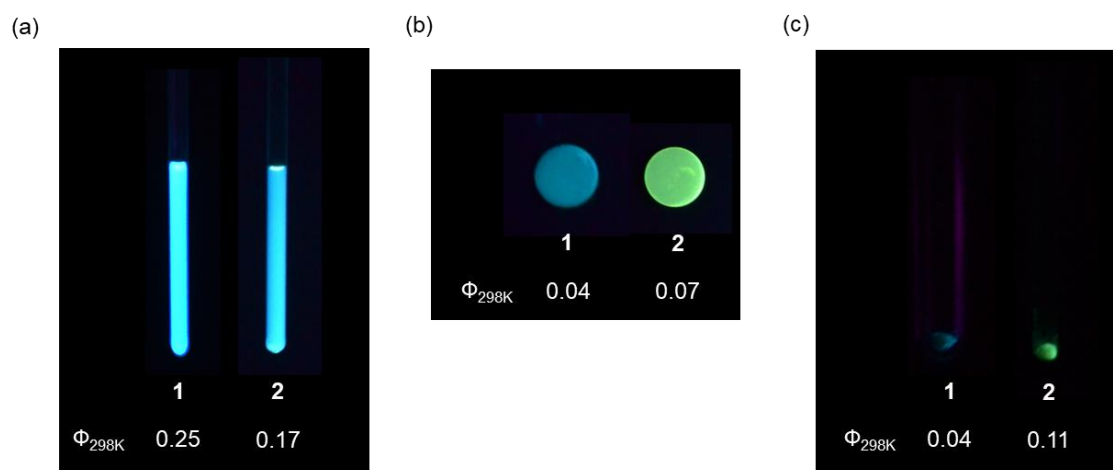

**Fig. S20** Photographs of (a)  $\text{CH}_2\text{Cl}_2$  solutions ( $2.0 \times 10^{-4}$  M), (b) KBr-dispersed pellet and (c) crystals of (*S,S*)-1 and (*S,S*)-2 at 298 K under UV illumination at 365 nm.

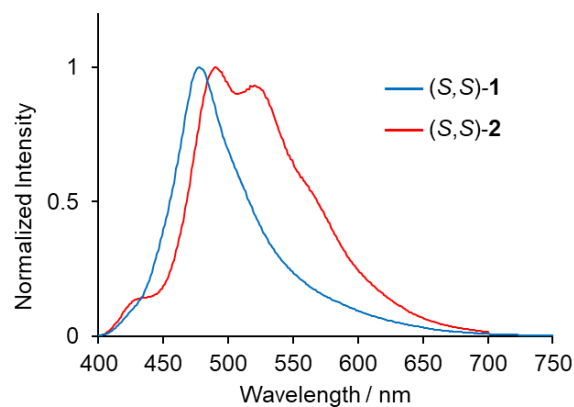

**Fig. S21** Normalized emission spectra of crystals of (*S,S*)-1 and (*S,S*)-2 ((*S,S*)-1:  $\lambda_{\text{ex}} = 350$  nm, (*S,S*)-2:  $\lambda_{\text{ex}} = 400$  nm).

**Table S2.** Photophysical data for complexes (*S,S*)-1 and (*S,S*)-2.

| Compound         | Solution <sup>[a]</sup>     |                                            |                         | KBr-dispersed pellet                       |                         | Crystal                                    |                         |
|------------------|-----------------------------|--------------------------------------------|-------------------------|--------------------------------------------|-------------------------|--------------------------------------------|-------------------------|
|                  | $\lambda_{\text{abs}}$ [nm] | $\lambda_{\text{max}}$ [nm] <sup>[b]</sup> | $\phi$ <sup>[b,d]</sup> | $\lambda_{\text{max}}$ [nm] <sup>[c]</sup> | $\phi$ <sup>[b,d]</sup> | $\lambda_{\text{max}}$ [nm] <sup>[c]</sup> | $\phi$ <sup>[b,d]</sup> |
| ( <i>S,S</i> )-1 | 398, 413                    | 462                                        | 0.25                    | 491                                        | 0.04                    | 478                                        | 0.04                    |
| ( <i>S,S</i> )-2 | 408, 426                    | 469                                        | 0.17                    | 484, 509                                   | 0.07                    | 489, 517                                   | 0.11                    |

[a] Data were obtained from a  $2.0 \times 10^{-4}$  M solution in  $\text{CH}_2\text{Cl}_2$  at 298 K. [b]  $\lambda_{\text{ex}} = 350$  nm. [c]  $\lambda_{\text{ex}} = 350$  (1), 400 nm (2). [d] Luminescent quantum efficiencies measured using the absolute method with an integrating sphere.

## 5. Computational Methods

All calculations were carried out based on DFT with the CAM-B3LYP exchange-correlation functional, using the Gaussian 16W program package.<sup>S3</sup> The basis set used was 6-31+G(d,p) for all atoms. Molecular orbitals and their eigenvalues for  $\Delta$ -(*S,S*)-1 and  $\Delta$ -(*S,S*)-2 were estimated using the optimized geometries determined by the DFT calculations using initial geometries obtained from XRD analysis. An initial structure with opposite configuration at the metal,  $\Delta$ -(*S,S*)-1 and  $\Delta$ -(*S,S*)-2, was obtained by mirror inversion of the optimized structure of  $\Delta$ -(*S,S*)-1 and  $\Delta$ -(*S,S*)-2, followed by manual inversion of the carbon chirality centers only. The singlet–singlet ( $E(\text{Sn})$ ) transition energies were estimated by time-dependent (TD) DFT calculation (CAM-B3LYP/6-31+G(d,p)).

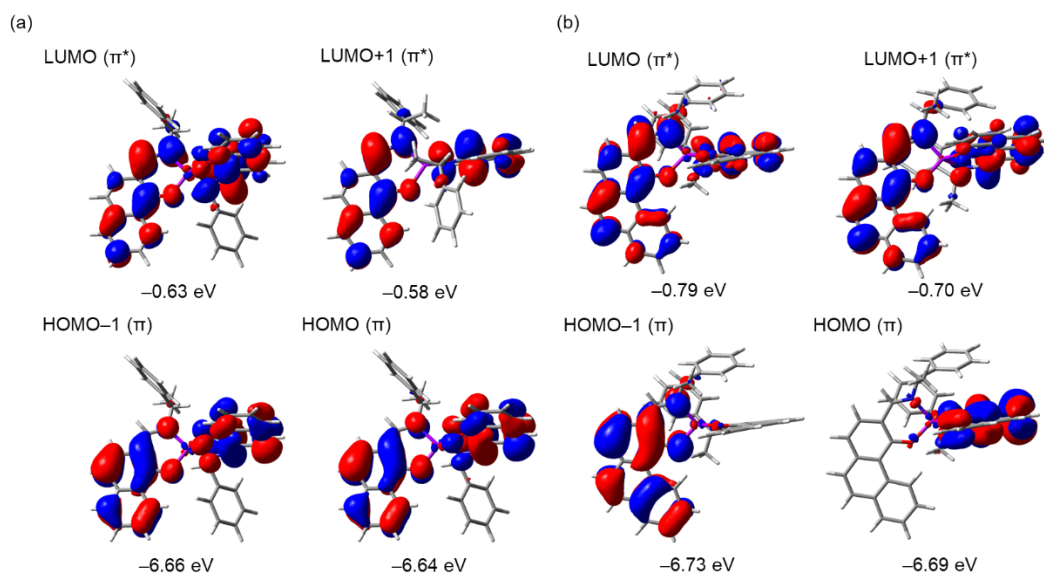

**Fig. S22** Molecular orbitals and eigenvalues for the frontier orbitals of (a)  $\Delta$ -(*S,S*)-1 and (b)  $\Delta$ -(*S,S*)-2 estimated from DFT calculations (CAM-B3LYP/6-31+G(d,p)) on the basis of the optimized geometries in the ground states.

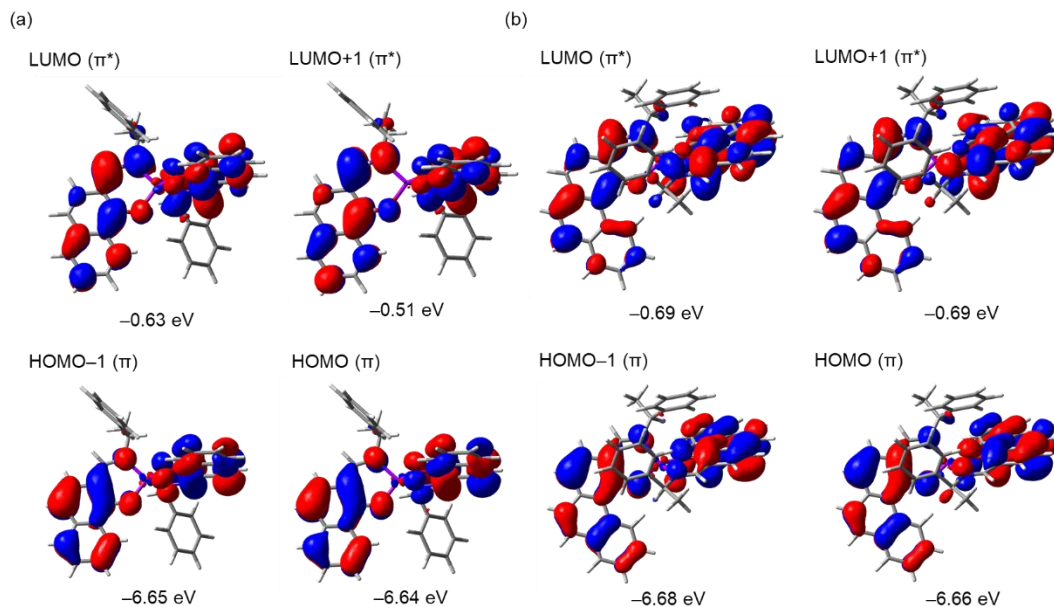

**Fig. S23** Molecular orbitals and eigenvalues for the frontier orbitals of (a)  $\Delta$ -(*S,S*)-1 and (b)  $\Delta$ -(*S,S*)-2 estimated from DFT calculations (CAM-B3LYP/6-31+G(d,p)) on the basis of the optimized geometries in the ground states.

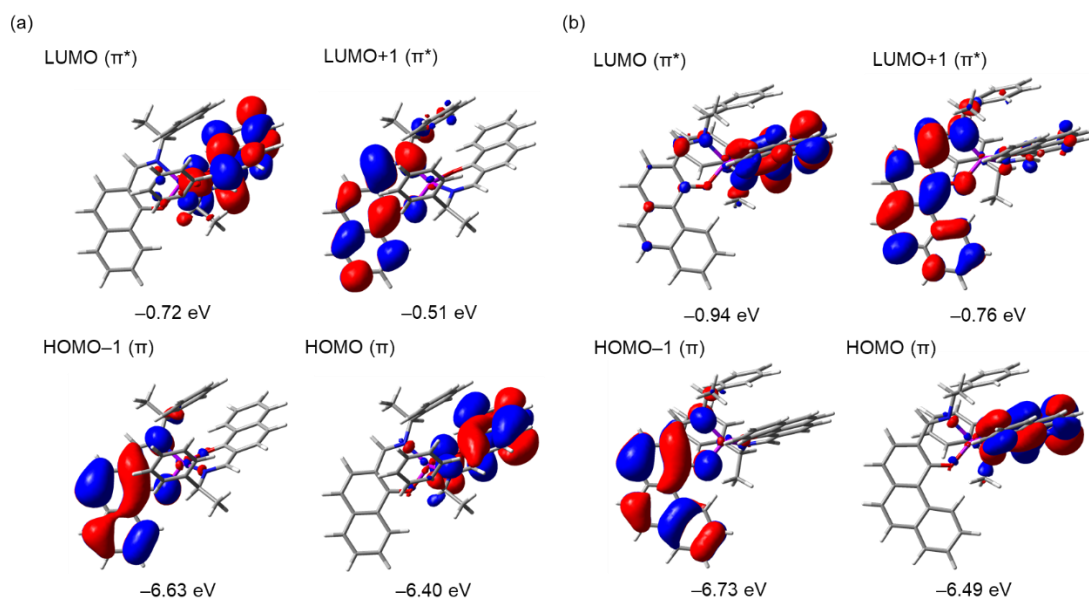

**Fig. S24** Molecular orbitals and eigenvalues for the frontier orbitals of (a) *A*-(*S,S*)-**1** and (b) *A*-(*S,S*)-**2** estimated from DFT calculations (CAM-B3LYP/6-31+G(d,p)) on the basis of the optimized geometries in the  $S_1$  excited states.

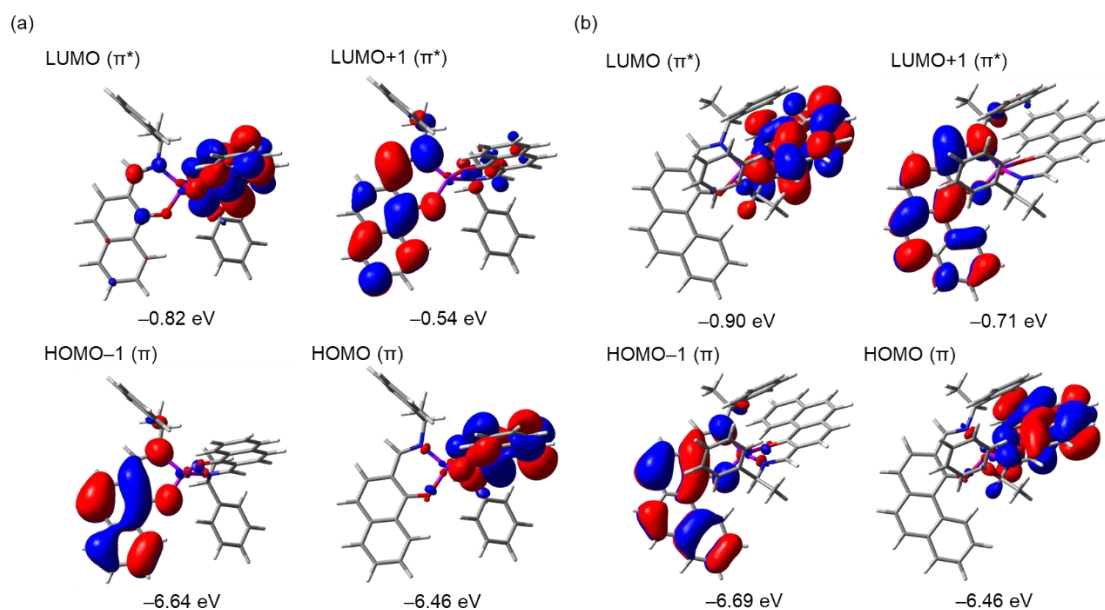

**Fig. S25** Molecular orbitals and eigenvalues for the frontier orbitals of (a) *A*-(*S,S*)-**1** and (b) *A*-(*S,S*)-**2** estimated from DFT calculations (CAM-B3LYP/6-31+G(d,p)) on the basis of the optimized geometries in the  $S_1$  excited states.

**Table S3.** Selected data for excitation energy, major configuration, coefficient, and oscillator strength for **1** and **2** (for the geometries optimized in the  $S_0$  state).<sup>[a]</sup>

| Compound                                    | State | Excitation energy (eV) | Major configuration <sup>[b]</sup> | Coefficient | Oscillator strength |
|---------------------------------------------|-------|------------------------|------------------------------------|-------------|---------------------|
| <i>A</i> -( <i>S</i> , <i>S</i> )- <b>1</b> | $S_1$ | 3.54 (350 nm)          | HOMO→LUMO+1                        | 0.527       | 0.122               |
|                                             | $S_2$ | 3.57 (347 nm)          | HOMO→LUMO                          | 0.527       | 0.265               |
| <i>A</i> -( <i>S</i> , <i>S</i> )- <b>2</b> | $S_1$ | 3.48 (356 nm)          | HOMO→LUMO+1                        | 0.438       | 0.217               |
|                                             | $S_2$ | 3.51 (353 nm)          | HOMO-1→LUMO                        | 0.477       | 0.276               |
| <i>A</i> -( <i>S</i> , <i>S</i> )- <b>1</b> | $S_1$ | 3.55 (349 nm)          | HOMO→LUMO+1                        | 0.520       | 0.123               |
|                                             | $S_2$ | 3.59 (345 nm)          | HOMO→LUMO                          | 0.524       | 0.280               |
| <i>A</i> -( <i>S</i> , <i>S</i> )- <b>2</b> | $S_1$ | 3.47 (357 nm)          | HOMO-1→LUMO                        | 0.487       | 0.0156              |
|                                             |       |                        | HOMO→LUMO+1                        | 0.476       |                     |
|                                             | $S_2$ | 3.47 (357 nm)          | HOMO-1→LUMO                        | 0.487       | 0.0156              |
|                                             |       |                        | HOMO→LUMO+1                        | 0.476       |                     |

[a] Estimated by TD-DFT (CAM-B3LYP/6-31+G(d,p)) calculations based on the optimized geometries. [b] Molecular orbitals are shown in Fig. S20 and S21.

**Table S4.** Selected data for excitation energy, major configuration, coefficient, and oscillator strength for **1** and **2** (for the geometries optimized in the  $S_1$  state).<sup>[a]</sup>

| Compound                                    | State | Excitation energy (eV) | Major configuration <sup>[b]</sup> | Coefficient | Oscillator strength |
|---------------------------------------------|-------|------------------------|------------------------------------|-------------|---------------------|
| <i>A</i> -( <i>S</i> , <i>S</i> )- <b>1</b> | $S_1$ | 3.19 (389 nm)          | HOMO→LUMO                          | 0.689       | 0.156               |
| <i>A</i> -( <i>S</i> , <i>S</i> )- <b>2</b> | $S_1$ | 3.13 (396 nm)          | HOMO→LUMO                          | 0.674       | 0.219               |
| <i>A</i> -( <i>S</i> , <i>S</i> )- <b>1</b> | $S_1$ | 3.19 (388 nm)          | HOMO→LUMO                          | 0.684       | 0.180               |
| <i>A</i> -( <i>S</i> , <i>S</i> )- <b>2</b> | $S_1$ | 3.12 (398 nm)          | HOMO→LUMO                          | 0.685       | 0.213               |

[a] Estimated by TD-DFT (CAM-B3LYP/6-31+G(d,p)) calculations based on the optimized geometries. [b] Molecular orbitals are shown in Fig. S22 and S23.

**Table S5.** Calculated transition dipole moments and chiroptical properties for **1** and **2** (for the geometries optimized in the  $S_0$  state).<sup>[a]</sup>

| Compound                           | State          | $ \mu_e ^{[b]} / 10^{-20}$ esu·cm | $ \mu_m ^{[c]} / 10^{-20}$ erg·G <sup>-1</sup> | $\cos(\theta_{e,m})^{[d]}$ | $g_{\text{abs}}^{[e]}$ |
|------------------------------------|----------------|-----------------------------------|------------------------------------------------|----------------------------|------------------------|
| <i>A</i> -( <i>S,S</i> )- <b>1</b> | S <sub>1</sub> | 300.84                            | 2.457                                          | -1                         | $-3.27 \times 10^{-2}$ |
|                                    | S <sub>2</sub> | 442.18                            | 2.146                                          | 0.9982                     | $1.94 \times 10^{-2}$  |
| <i>A</i> -( <i>S,S</i> )- <b>2</b> | S <sub>1</sub> | 405.35                            | 2.945                                          | 0.9434                     | $2.74 \times 10^{-2}$  |
|                                    | S <sub>2</sub> | 455.87                            | 2.658                                          | -0.9361                    | $2.18 \times 10^{-2}$  |
| <i>A</i> -( <i>S,S</i> )- <b>1</b> | S <sub>1</sub> | 301.91                            | 2.556                                          | 1                          | $3.39 \times 10^{-2}$  |
|                                    | S <sub>2</sub> | 453.55                            | 1.919                                          | -0.996                     | $-1.69 \times 10^{-2}$ |
| <i>A</i> -( <i>S,S</i> )- <b>2</b> | S <sub>1</sub> | 344.25                            | 3.393                                          | -1                         | $-3.94 \times 10^{-2}$ |
|                                    | S <sub>2</sub> | 508.53                            | 2.080                                          | 0.9928                     | $1.62 \times 10^{-2}$  |

[a] Calculated at the CAM-B3LYP/6-31+G(d,p) level of theory. [b] Transition electric dipole moment (TEDM). [c] Transition magnetic dipole moment (TMDM). [d]  $\cos(\theta_{e,m})$  represents the angle of TEDM and TMDM. [e] Dissymmetry factor ( $g_{\text{abs}}$ ) was calculated follows:  $g_{\text{abs}} = 4R/(D + G)$ , where  $R$ ,  $D$ , and  $G$  represent the rotatory, electric dipole, magnetic dipole strength ( $R = |\mu_e||\mu_m|\cos\theta$ ,  $D = |\mu_e|^2$ ,  $G = |\mu_m|^2$ )

**Table S6.** Calculated transition dipole moments and chiroptical properties for **1** and **2** (for the geometries optimized in the  $S_1$  state).<sup>[a]</sup>

| Compound                           | State          | $ \mu_e ^{[b]} / 10^{-20}$ esu·cm | $ \mu_m ^{[c]} / 10^{-20}$ erg·G <sup>-1</sup> | $\cos(\theta_{e,m})^{[d]}$ | $g_{\text{lum}}^{[e]}$ |
|------------------------------------|----------------|-----------------------------------|------------------------------------------------|----------------------------|------------------------|
| <i>A</i> -( <i>S,S</i> )- <b>1</b> | S <sub>1</sub> | 358.96                            | 2.385                                          | -0.2455                    | $-6.52 \times 10^{-3}$ |
| <i>A</i> -( <i>S,S</i> )- <b>2</b> | S <sub>1</sub> | 430.26                            | 2.748                                          | 0.0948                     | $2.42 \times 10^{-3}$  |
| <i>A</i> -( <i>S,S</i> )- <b>1</b> | S <sub>1</sub> | 385.35                            | 2.285                                          | 0.03629                    | $8.61 \times 10^{-4}$  |
| <i>A</i> -( <i>S,S</i> )- <b>2</b> | S <sub>1</sub> | 424.21                            | 2.878                                          | -0.2125                    | $-5.77 \times 10^{-3}$ |

[a] Calculated at the CAM-B3LYP/6-31+G(d,p) level of theory. [b] Transition electric dipole moment (TEDM). [c] Transition magnetic dipole moment (TMDM). [d]  $\cos(\theta_{e,m})$  represents the angle of TEDM and TMDM. [e] Dissymmetry factor ( $g_{\text{lum}}$ ) was calculated follows:  $g_{\text{lum}} = 4R/(D + G)$ , where  $R$ ,  $D$ , and  $G$  represent the rotatory, electric dipole, magnetic dipole strength ( $R = |\mu_e||\mu_m|\cos\theta$ ,  $D = |\mu_e|^2$ ,  $G = |\mu_m|^2$ )

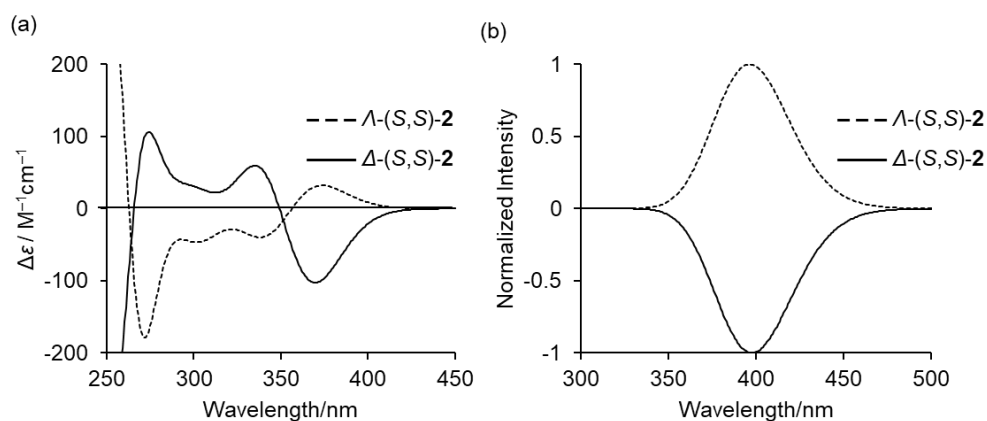

**Fig. S26** Theoretical (a) CD and (b) CPL spectra of  $\Delta$ -(S,S)-2 and  $\Lambda$ -(S,S)-2 estimated by TD-DFT calculation (CAM-B3LYP/6-31+G(d,p)).

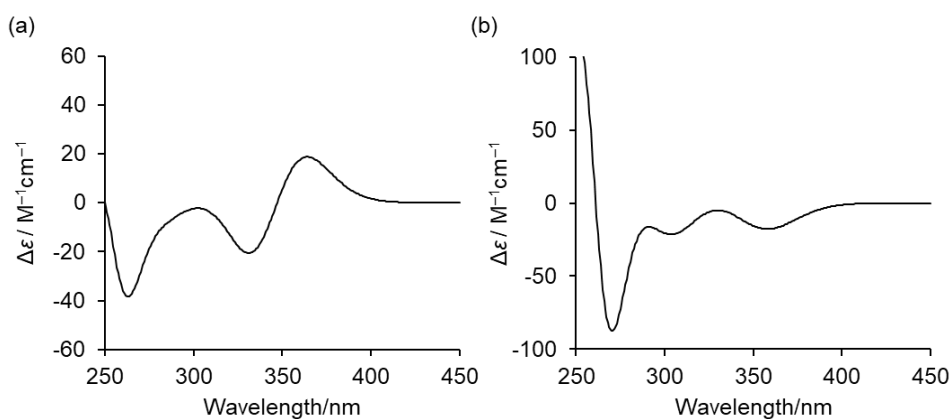

**Fig. S27** Theoretical CD spectra of (a) (S,S)-1 and (b) (S,S)-2 simulated by 2 : 1 ratio of  $\Lambda$ -(S,S) and  $\Delta$ -(S,S)-isomer estimated by TD-DFT calculation (CAM-B3LYP/6-31+G(d,p)).

## 6. Cartesian Coordinates (in Å)

**Table S7.** Cartesian coordinates (in angstrom) of  $\Delta$ -(S,S)-**1** in S<sub>0</sub> state<sup>[a]</sup>.

| atom | x         | y         | z         |
|------|-----------|-----------|-----------|
| Zn   | -0.000001 | -0.000003 | -0.365121 |
| O    | 1.623526  | 0.33089   | 0.62738   |
| N    | -0.014672 | 1.768877  | -1.318927 |
| C    | -2.336272 | 4.426589  | -1.981517 |
| H    | -1.848878 | 4.748601  | -2.898343 |
| C    | -1.112252 | 2.23061   | -2.198868 |
| H    | -0.662018 | 2.804491  | -3.019088 |
| C    | 2.129935  | 2.469602  | -0.319655 |
| C    | -2.065314 | 3.160281  | -1.465241 |
| C    | 0.97336   | 2.592822  | -1.153431 |
| H    | 0.92948   | 3.533405  | -1.71466  |
| C    | -3.227335 | 5.283769  | -1.33891  |
| H    | -3.426839 | 6.266281  | -1.755104 |
| C    | 3.561364  | 1.422936  | 1.388126  |
| C    | 2.379012  | 1.37557   | 0.544757  |
| C    | -2.698957 | 2.760883  | -0.285134 |
| H    | -2.494642 | 1.780562  | 0.135789  |
| C    | -1.843649 | 1.034653  | -2.802498 |
| H    | -1.152465 | 0.393895  | -3.356546 |
| H    | -2.621132 | 1.380971  | -3.487467 |
| H    | -2.326762 | 0.435949  | -2.025561 |
| C    | 3.061403  | 3.559004  | -0.358424 |
| H    | 2.847082  | 4.384114  | -1.033035 |
| C    | 3.820314  | 0.373668  | 2.294649  |
| H    | 3.111349  | -0.444329 | 2.345591  |
| C    | -3.854704 | 4.879472  | -0.166439 |
| H    | -4.548389 | 5.543769  | 0.339056  |
| C    | 4.453886  | 2.518447  | 1.312459  |
| C    | -3.586622 | 3.616112  | 0.357047  |
| H    | -4.073622 | 3.292916  | 1.271809  |
| C    | 4.936062  | 0.399962  | 3.09911   |
| H    | 5.124561  | -0.408439 | 3.798099  |
| C    | 5.595667  | 2.518164  | 2.145365  |
| H    | 6.284564  | 3.355877  | 2.08752   |
| C    | 4.179553  | 3.593293  | 0.408629  |
| H    | 4.867184  | 4.430868  | 0.356504  |
| C    | 5.833385  | 1.482367  | 3.0188    |
| H    | 6.714415  | 1.500618  | 3.652962  |
| O    | -1.623524 | -0.3309   | 0.627385  |
| N    | 0.014668  | -1.76888  | -1.318932 |
| C    | 2.336279  | -4.426582 | -1.981517 |
| H    | 1.848886  | -4.7486   | -2.898341 |

|   |           |           |           |
|---|-----------|-----------|-----------|
| C | 1.112247  | -2.230611 | -2.198875 |
| H | 0.662013  | -2.804497 | -3.019093 |
| C | -2.129939 | -2.469606 | -0.319661 |
| C | 2.065315  | -3.160273 | -1.465246 |
| C | -0.973366 | -2.592824 | -1.153438 |
| H | -0.929488 | -3.533404 | -1.714672 |
| C | 3.227349  | -5.283753 | -1.338907 |
| H | 3.426858  | -6.266266 | -1.755096 |
| C | -3.561364 | -1.422945 | 1.388127  |
| C | -2.379012 | -1.375577 | 0.544757  |
| C | 2.698958  | -2.760865 | -0.285142 |
| H | 2.494639  | -1.780543 | 0.135776  |
| C | 1.843637  | -1.034652 | -2.802511 |
| H | 1.152449  | -0.393899 | -3.35656  |
| H | 2.62112   | -1.380968 | -3.487481 |
| H | 2.326748  | -0.435944 | -2.025577 |
| C | -3.06141  | -3.559006 | -0.358435 |
| H | -2.847091 | -4.384113 | -1.03305  |
| C | -3.82031  | -0.373681 | 2.294656  |
| H | -3.111343 | 0.444313  | 2.345602  |
| C | 3.854718  | -4.879447 | -0.166439 |
| H | 4.548407  | -5.543737 | 0.339057  |
| C | -4.453888 | -2.518453 | 1.312455  |
| C | 3.586629  | -3.616086 | 0.357041  |
| H | 4.073629  | -3.292883 | 1.271801  |
| C | -4.936057 | -0.399976 | 3.099118  |
| H | -5.124554 | 0.408421  | 3.798112  |
| C | -5.595668 | -2.518172 | 2.145363  |
| H | -6.284568 | -3.355883 | 2.087514  |
| C | -4.179559 | -3.593296 | 0.408619  |
| H | -4.867192 | -4.430869 | 0.356491  |
| C | -5.833383 | -1.482379 | 3.018803  |
| H | -6.714413 | -1.500631 | 3.652967  |

---

[a] The geometry was optimized by DFT calculation (CAM-B3LYP/6-31+G(d,p)).



**Table S8.** Cartesian coordinates (in angstrom) of *A*-(*S*,*S*)-**2** in  $S_0$  state<sup>[a]</sup>.

| atom | x         | y         | z         |
|------|-----------|-----------|-----------|
| Zn   | 0.020543  | -0.251668 | 0.012424  |
| O    | -1.624398 | 0.756949  | -0.061535 |
| O    | 1.704569  | 0.703735  | -0.016733 |
| N    | 0.289831  | -0.956978 | 1.870025  |
| N    | -0.294495 | -1.216044 | -1.719892 |
| C    | -5.176449 | 3.140229  | 0.512389  |
| C    | 2.670577  | 0.705604  | 0.844848  |
| C    | -6.282159 | 2.81776   | -0.334046 |
| H    | -7.218207 | 3.349404  | -0.188178 |
| C    | -2.628655 | 0.622882  | -0.865359 |
| C    | -3.933774 | 2.463956  | 0.352885  |
| C    | 4.948952  | 1.35866   | 1.490705  |
| C    | -1.530219 | -2.621989 | 1.788723  |
| C    | -4.276332 | 4.514418  | 2.297702  |
| H    | -4.399663 | 5.292978  | 3.043669  |
| C    | 4.026866  | 2.353157  | -0.577152 |
| C    | -2.7589   | -2.341229 | 1.190765  |
| H    | -3.219244 | -1.368544 | 1.318748  |
| C    | -1.445566 | -1.096547 | -2.299581 |
| H    | -1.583053 | -1.661093 | -3.229214 |
| C    | -3.734083 | -0.486639 | -2.765338 |
| H    | -3.681015 | -1.205027 | -3.579412 |
| C    | 1.41945   | -0.775867 | 2.472267  |
| H    | 1.515501  | -1.211081 | 3.474422  |
| C    | 3.873255  | 1.476883  | 0.581748  |
| C    | 1.395305  | -3.035332 | -1.568011 |
| C    | -4.87943  | 0.212861  | -2.547629 |
| H    | -5.754003 | 0.062574  | -3.171486 |
| C    | -0.787515 | -1.608267 | 2.644071  |
| H    | -0.314226 | -2.166485 | 3.463314  |
| C    | -2.870165 | 2.879171  | 1.194888  |
| H    | -1.907806 | 2.407982  | 1.085932  |
| C    | 2.589025  | -0.058024 | 2.045246  |
| C    | -3.824071 | 1.425171  | -0.668623 |
| C    | -4.937507 | 1.172245  | -1.501419 |
| C    | 2.363364  | -2.700562 | -0.619059 |
| H    | 2.658533  | -1.666006 | -0.485612 |
| C    | -2.594083 | -0.311969 | -1.939317 |
| C    | 3.002059  | 2.628363  | -1.518555 |
| H    | 2.037539  | 2.168075  | -1.38561  |
| C    | -6.163011 | 1.885781  | -1.305942 |
| H    | -6.999211 | 1.654986  | -1.95886  |

|   |           |           |           |
|---|-----------|-----------|-----------|
| C | -3.038879 | 3.874026  | 2.134383  |
| H | -2.194876 | 4.164887  | 2.752347  |
| C | -5.325136 | 4.147403  | 1.489541  |
| H | -6.290922 | 4.635951  | 1.584032  |
| C | 6.180722  | 2.045332  | 1.245756  |
| H | 6.987635  | 1.919902  | 1.961222  |
| C | 5.273838  | 3.009606  | -0.77935  |
| C | -1.678625 | -0.528991 | 3.258479  |
| H | -1.093527 | 0.081292  | 3.951429  |
| H | -2.507015 | -0.981595 | 3.809959  |
| H | -2.083779 | 0.135188  | 2.492088  |
| C | 3.211097  | 3.474448  | -2.586771 |
| H | 2.395855  | 3.661941  | -3.278879 |
| C | -2.84664  | -4.561233 | 0.248701  |
| H | -3.360252 | -5.313681 | -0.341704 |
| C | 1.73922   | -1.015411 | -3.073954 |
| H | 1.229616  | -0.360854 | -3.786343 |
| H | 2.520399  | -1.56765  | -3.60294  |
| H | 2.207885  | -0.383616 | -2.316774 |
| C | 0.736458  | -1.986809 | -2.446651 |
| H | 0.231668  | -2.525304 | -3.259156 |
| C | 1.054944  | -4.37889  | -1.726758 |
| H | 0.304803  | -4.656388 | -2.462308 |
| C | 4.84657   | 0.564007  | 2.664115  |
| H | 5.693931  | 0.513467  | 3.339413  |
| C | -0.968452 | -3.88683  | 1.598869  |
| H | -0.006754 | -4.1181   | 2.048813  |
| C | -1.618958 | -4.850938 | 0.838831  |
| H | -1.165751 | -5.827905 | 0.706711  |
| C | -3.411521 | -3.302833 | 0.423065  |
| H | -4.365385 | -3.062651 | -0.035669 |
| C | 3.693651  | -0.103139 | 2.934996  |
| H | 3.604837  | -0.691615 | 3.844688  |
| C | 5.464595  | 3.862226  | -1.887505 |
| H | 6.432535  | 4.340082  | -2.010217 |
| C | 6.341147  | 2.82496   | 0.153154  |
| H | 7.281843  | 3.336984  | -0.02851  |
| C | 4.452923  | 4.095505  | -2.78737  |
| H | 4.608294  | 4.755819  | -3.634525 |
| C | 2.623927  | -5.022813 | -0.014726 |
| H | 3.106269  | -5.791648 | 0.580821  |
| C | 2.968419  | -3.684665 | 0.155921  |
| H | 3.720703  | -3.401992 | 0.885771  |
| C | 1.665193  | -5.36827  | -0.961723 |
| H | 1.393248  | -6.408992 | -1.1087   |

---

[a] The geometry was optimized by DFT calculation (CAM-B3LYP/6-31+G(d,p)).

**Table S9.** Cartesian coordinates (in angstrom) of *A*-(*S*,*S*)-**1** in  $S_0$  state<sup>[a]</sup>.

| atom | x         | y         | z         |
|------|-----------|-----------|-----------|
| Zn   | 0.000001  | 0.000003  | 0.230893  |
| O    | -1.713218 | -0.118637 | -0.659127 |
| N    | -0.137503 | -1.761819 | 1.146525  |
| C    | 1.41751   | -4.759985 | 2.219849  |
| H    | 0.88239   | -4.802134 | 3.162574  |
| C    | 0.952083  | -2.242498 | 2.034722  |
| C    | -2.280012 | -2.326216 | 0.084589  |
| C    | 1.550578  | -3.551453 | 1.539095  |
| C    | -1.129419 | -2.560094 | 0.903665  |
| H    | -1.099534 | -3.554428 | 1.360895  |
| C    | 1.978581  | -5.930211 | 1.708096  |
| H    | 1.866268  | -6.862446 | 2.252806  |
| C    | -3.711822 | -1.058094 | -1.465305 |
| C    | -2.506847 | -1.138707 | -0.655883 |
| C    | 2.26301   | -3.534097 | 0.334837  |
| H    | 2.373161  | -2.594492 | -0.200731 |
| C    | -3.23848  | -3.38993  | 0.016676  |
| H    | -3.034976 | -4.290627 | 0.590505  |
| C    | -3.964072 | 0.096689  | -2.234866 |
| H    | -3.234363 | 0.897157  | -2.207001 |
| C    | 2.680495  | -5.902598 | 0.509837  |
| H    | 3.118984  | -6.812346 | 0.112337  |
| C    | -4.634198 | -2.130979 | -1.492475 |
| C    | 2.822758  | -4.697196 | -0.176146 |
| H    | 3.374776  | -4.664359 | -1.110137 |
| C    | -5.100045 | 0.194523  | -3.004734 |
| H    | -5.283894 | 1.085493  | -3.596332 |
| C    | -5.795178 | -2.004096 | -2.288618 |
| H    | -6.50598  | -2.82512  | -2.309809 |
| C    | -4.370644 | -3.310054 | -0.726265 |
| H    | -5.079162 | -4.1312   | -0.755368 |
| C    | -6.025042 | -0.867127 | -3.027904 |
| H    | -6.921642 | -0.788289 | -3.635082 |
| O    | 1.71321   | 0.118621  | -0.65915  |
| N    | 0.137516  | 1.761846  | 1.146481  |
| C    | -1.417483 | 4.760039  | 2.219749  |
| H    | -0.882352 | 4.802211  | 3.162467  |
| C    | -0.952059 | 2.242548  | 2.034679  |
| C    | 2.280013  | 2.326217  | 0.084507  |
| C    | -1.55056  | 3.551491  | 1.539027  |
| C    | 1.129429  | 2.560116  | 0.903591  |
| H    | 1.09955   | 3.554461  | 1.360797  |

|   |           |           |           |
|---|-----------|-----------|-----------|
| C | -1.97856  | 5.930254  | 1.707975  |
| H | -1.86624  | 6.862502  | 2.25266   |
| C | 3.711804  | 1.058058  | -1.465373 |
| C | 2.506839  | 1.138691  | -0.655939 |
| C | -2.263006 | 3.534106  | 0.334777  |
| H | -2.373164 | 2.594488  | -0.200766 |
| C | 3.238482  | 3.38993   | 0.016558  |
| H | 3.034984  | 4.290641  | 0.590368  |
| C | 3.964045  | -0.096744 | -2.23491  |
| H | 3.234336  | -0.89721  | -2.207018 |
| C | -2.680488 | 5.902611  | 0.509724  |
| H | -3.118982 | 6.81235   | 0.112208  |
| C | 4.634181  | 2.130942  | -1.492579 |
| C | -2.82276  | 4.697193  | -0.176227 |
| H | -3.374788 | 4.664333  | -1.110211 |
| C | 5.100009  | -0.194596 | -3.004788 |
| H | 5.283852  | -1.08558  | -3.596368 |
| C | 5.795152  | 2.004039  | -2.288732 |
| H | 6.505954  | 2.825063  | -2.309951 |
| C | 4.370637  | 3.310035  | -0.726394 |
| H | 5.079155  | 4.13118   | -0.755525 |
| C | 6.025007  | 0.867053  | -3.027994 |
| H | 6.9216    | 0.7882    | -3.63518  |
| C | -0.485426 | 2.249666  | 3.488526  |
| H | 0.338177  | 2.951298  | 3.649177  |
| H | -1.305538 | 2.520516  | 4.158556  |
| H | -0.129077 | 1.254552  | 3.765344  |
| C | 0.485466  | -2.249581 | 3.488574  |
| H | -0.338135 | -2.951209 | 3.649252  |
| H | 1.305586  | -2.520414 | 4.158602  |
| H | 0.12912   | -1.25446  | 3.765372  |
| H | -1.739759 | 1.488712  | 1.945208  |
| H | 1.739781  | -1.488664 | 1.945224  |

---

[a] The geometry was optimized by DFT calculation (CAM-B3LYP/6-31+G(d,p)).

**Table S10.** Cartesian coordinates (in angstrom) of  $\Delta$ -(S,S)-2 in S<sub>0</sub> state<sup>[a]</sup>.

| atom | x         | y         | z         |
|------|-----------|-----------|-----------|
| Zn   | 0.000041  | -0.097275 | -0.000112 |
| O    | -1.740492 | -0.923736 | -0.145991 |
| O    | 1.740581  | -0.923718 | 0.145276  |
| N    | 0.026339  | 0.632479  | 1.864617  |
| N    | -0.026587 | 0.634026  | -1.864156 |
| C    | -5.70404  | -2.518629 | 0.454224  |
| C    | 2.65876   | -0.717756 | 1.034674  |
| C    | -6.675123 | -2.160989 | -0.532188 |
| H    | -7.697859 | -2.502386 | -0.399738 |
| C    | -2.658881 | -0.716766 | -1.034936 |
| C    | -4.352641 | -2.091751 | 0.314824  |
| C    | 4.984397  | -0.965256 | 1.792874  |
| C    | -1.805821 | 2.2697    | 1.664771  |
| C    | -5.190778 | -3.703331 | 2.508868  |
| H    | -5.503073 | -4.315433 | 3.348884  |
| C    | 4.352924  | -2.091078 | -0.316306 |
| C    | -3.07509  | 2.189594  | 1.092629  |
| H    | -3.635549 | 1.261742  | 1.161169  |
| C    | -1.108149 | 0.581206  | -2.567924 |
| H    | -1.074503 | 0.974276  | -3.585633 |
| C    | -3.430309 | 0.271707  | -3.153156 |
| H    | -3.20059  | 0.844558  | -4.048078 |
| C    | 1.107709  | 0.578736  | 2.568612  |
| H    | 1.073885  | 0.970815  | 3.586694  |
| C    | 3.989624  | -1.266173 | 0.834465  |
| C    | 1.805642  | 2.271074  | -1.663495 |
| C    | -4.690928 | -0.197742 | -2.951362 |
| H    | -5.481387 | -0.005177 | -3.668825 |
| C    | -1.250847 | 1.091917  | 2.448876  |
| C    | -3.442737 | -2.52818  | 1.312478  |
| H    | -2.406466 | -2.24821  | 1.225251  |
| C    | 2.396384  | 0.042737  | 2.210629  |
| C    | -3.989678 | -1.265446 | -0.835043 |
| C    | -4.984715 | -0.963389 | -1.79282  |
| C    | 3.074681  | 2.190297  | -1.09089  |
| H    | 3.634851  | 1.262286  | -1.159635 |
| C    | -2.396798 | 0.045046  | -2.210115 |
| C    | 3.443309  | -2.526359 | -1.314727 |
| H    | 2.406989  | -2.246603 | -1.227401 |
| C    | -6.327301 | -1.427684 | -1.612768 |
| H    | -7.063231 | -1.169016 | -2.367993 |
| C    | -3.851491 | -3.309477 | 2.372786  |

|   |           |           |           |
|---|-----------|-----------|-----------|
| H | -3.118337 | -3.626657 | 3.108264  |
| C | -6.097272 | -3.310753 | 1.553706  |
| H | -7.13867  | -3.611815 | 1.625963  |
| C | 6.327042  | -1.429304 | 1.61263   |
| H | 7.062754  | -1.171545 | 2.368379  |
| C | 5.704382  | -2.517716 | -0.455875 |
| C | 3.852388  | -3.306317 | -2.375895 |
| H | 3.119443  | -3.622649 | -3.111945 |
| C | -2.911964 | 4.472158  | 0.334971  |
| H | -3.341263 | 5.328187  | -0.176156 |
| C | 1.250595  | 1.093717  | -2.448222 |
| C | 1.089143  | 3.463282  | -1.549211 |
| H | 0.089148  | 3.536232  | -1.967248 |
| C | 4.69029   | -0.200999 | 2.952253  |
| H | 5.480547  | -0.00931  | 3.670173  |
| C | -1.088938 | 3.461718  | 1.550695  |
| H | -0.088745 | 3.534105  | 1.968353  |
| C | -1.639466 | 4.557159  | 0.895143  |
| H | -1.072646 | 5.479731  | 0.819865  |
| C | -3.626934 | 3.282921  | 0.430257  |
| H | -4.61432  | 3.200836  | -0.012651 |
| C | 3.429633  | 0.268263  | 3.154231  |
| H | 3.199682  | 0.840088  | 4.049748  |
| C | 6.097952  | -3.308455 | -1.556233 |
| H | 7.139387  | -3.609368 | -1.628583 |
| C | 6.675185  | -2.161262 | 0.531242  |
| H | 7.697967  | -2.502467 | 0.398651  |
| C | 5.191738  | -3.699905 | -2.512121 |
| H | 5.504295  | -4.310944 | -3.352814 |
| C | 2.912034  | 4.472587  | -0.33233  |
| H | 3.341422  | 5.32825   | 0.179336  |
| C | 3.626641  | 3.283138  | -0.427838 |
| H | 4.613827  | 3.200536  | 0.015418  |
| C | 1.639807  | 4.558266  | -0.892983 |
| H | 1.073279  | 5.481006  | -0.81757  |
| C | -1.229336 | 1.397417  | 3.946967  |
| H | -0.594153 | 2.254258  | 4.190376  |
| H | -2.245119 | 1.648317  | 4.25966   |
| H | -0.901381 | 0.534307  | 4.533625  |
| H | -1.939452 | 0.255486  | 2.290666  |
| H | 1.939189  | 0.257208  | -2.290429 |
| C | 1.22902   | 1.399894  | -3.946161 |
| H | 2.244812  | 1.650752  | -4.258857 |
| H | 0.900836  | 0.537094  | -4.533146 |
| H | 0.593966  | 2.256949  | -4.189157 |

---

[a] The geometry was optimized by DFT calculation (CAM-B3LYP/6-31+G(d,p)).

**Table S11.** Cartesian coordinates (in angstrom) of  $\Delta$ -(S,S)-**1** in S<sub>1</sub> state<sup>[a]</sup>.

| atom | x         | y         | z         |
|------|-----------|-----------|-----------|
| Zn   | 0.128246  | -0.606705 | -0.276643 |
| O    | -1.555385 | -1.620873 | -0.492401 |
| O    | 1.932296  | -1.195106 | -0.670185 |
| N    | 0.360013  | -0.63207  | 1.711675  |
| N    | -0.282519 | 0.727508  | -1.667159 |
| C    | -5.117301 | -3.550886 | 0.468337  |
| C    | 2.901558  | -1.305533 | 0.176098  |
| C    | -6.334444 | -3.079265 | -0.053028 |
| H    | -7.264513 | -3.584204 | 0.182249  |
| C    | -2.648389 | -1.129881 | -0.964037 |
| C    | -3.917912 | -2.920232 | 0.175894  |
| C    | 5.327776  | -1.758436 | 0.524946  |
| C    | -1.539608 | 0.822723  | 2.292691  |
| C    | 4.390617  | -1.849814 | -1.728882 |
| C    | -2.912647 | 0.856574  | 2.048809  |
| H    | -3.468018 | -0.074719 | 1.977032  |
| C    | -1.494441 | 0.826117  | -2.189441 |
| H    | -1.663126 | 1.544333  | -2.989901 |
| C    | -3.884254 | 0.460516  | -2.346158 |
| H    | -3.907394 | 1.326646  | -3.002372 |
| C    | 1.519982  | -0.861117 | 2.238193  |
| H    | 1.592363  | -0.882403 | 3.326894  |
| C    | 4.216962  | -1.641503 | -0.34447  |
| C    | 1.226176  | 2.642813  | -1.32201  |
| C    | -5.084835 | -0.180226 | -2.055131 |
| H    | -6.006762 | 0.190319  | -2.493086 |
| C    | -0.849672 | -0.507138 | 2.546912  |
| C    | 2.764861  | -1.123467 | 1.573893  |
| C    | -3.887806 | -1.77558  | -0.650134 |
| C    | -5.129926 | -1.303448 | -1.195693 |
| C    | 2.461094  | 2.647219  | -0.673886 |
| H    | 3.136649  | 1.806662  | -0.806961 |
| C    | -2.649825 | 0.060991  | -1.824117 |
| C    | -6.327459 | -1.964372 | -0.881617 |
| H    | -7.256032 | -1.591482 | -1.305245 |
| C    | 6.588806  | -2.076799 | -0.028964 |
| H    | 7.443376  | -2.166326 | 0.635551  |
| C    | 5.62822   | -2.161843 | -2.242822 |
| C    | -2.86812  | 3.265288  | 1.968093  |
| H    | -3.382261 | 4.213166  | 1.843263  |
| C    | 0.843816  | 1.482655  | -2.233068 |
| C    | 0.365326  | 3.726168  | -1.130527 |

|   |           |           |           |
|---|-----------|-----------|-----------|
| H | -0.610296 | 3.731503  | -1.607733 |
| C | 5.148315  | -1.560499 | 1.929911  |
| H | 6.001414  | -1.657427 | 2.593269  |
| C | -0.835687 | 2.025553  | 2.358284  |
| H | 0.238005  | 2.016302  | 2.521915  |
| C | -1.49539  | 3.239259  | 2.199758  |
| H | -0.932005 | 4.165004  | 2.247415  |
| C | -3.575456 | 2.070028  | 1.888205  |
| H | -4.643678 | 2.078481  | 1.695738  |
| C | 3.91503   | -1.266259 | 2.41519   |
| H | 3.779549  | -1.128074 | 3.485238  |
| C | 6.737575  | -2.273668 | -1.382263 |
| H | 7.713698  | -2.518855 | -1.789546 |
| C | 1.97789   | 4.794678  | 0.311891  |
| H | 2.27037   | 5.63146   | 0.938585  |
| C | 2.836488  | 3.714453  | 0.139616  |
| H | 3.802847  | 3.700327  | 0.634115  |
| C | 0.738296  | 4.795567  | -0.325962 |
| H | 0.059806  | 5.633061  | -0.194178 |
| C | -0.654201 | -0.72979  | 4.047829  |
| H | -0.020645 | 0.038577  | 4.500969  |
| H | -1.630798 | -0.67156  | 4.533067  |
| H | -0.23021  | -1.714877 | 4.263924  |
| H | -1.521468 | -1.290479 | 2.178694  |
| H | 1.687236  | 0.783988  | -2.215274 |
| C | 0.668604  | 1.94137   | -3.68305  |
| H | 1.618902  | 2.345768  | -4.039964 |
| H | 0.387778  | 1.10286   | -4.326695 |
| H | -0.077713 | 2.732558  | -3.793286 |
| H | -5.113643 | -4.427223 | 1.109488  |
| H | -2.981749 | -3.29953  | 0.56835   |
| H | 3.521358  | -1.762894 | -2.370094 |
| H | 5.751711  | -2.323336 | -3.308813 |

---

[a] The geometry was optimized by DFT calculation (CAM-B3LYP/6-31+G(d,p)).



**Table S12.** Cartesian coordinates (in angstrom) of *A*-(*S,S*)-**2** in  $S_1$  state<sup>[a]</sup>.

| atom | x         | y         | z         |
|------|-----------|-----------|-----------|
| Zn   | 0.055974  | 0.328285  | 0.040028  |
| O    | -1.568726 | -0.785887 | 0.186217  |
| O    | 1.723999  | -0.651636 | 0.050011  |
| N    | 0.20949   | 0.864148  | -1.878299 |
| N    | -0.28966  | 1.348572  | 1.688667  |
| C    | -5.111466 | -3.189961 | -0.440036 |
| C    | 2.653754  | -0.698262 | -0.848828 |
| C    | -6.26187  | -2.81366  | 0.313031  |
| H    | -7.19451  | -3.340228 | 0.139709  |
| C    | -2.612738 | -0.621155 | 0.911842  |
| C    | -3.851627 | -2.522938 | -0.241002 |
| C    | 4.909688  | -1.373051 | -1.549014 |
| C    | -1.690243 | 2.435643  | -1.813077 |
| C    | -4.110006 | -4.667351 | -2.091124 |
| H    | -4.202291 | -5.482196 | -2.802349 |
| C    | 4.090078  | -2.233375 | 0.619756  |
| C    | -2.971024 | 2.175994  | -1.325696 |
| H    | -3.449283 | 1.223404  | -1.523033 |
| C    | -1.458105 | 1.226025  | 2.296811  |
| H    | -1.606988 | 1.832841  | 3.193993  |
| C    | -3.755943 | 0.613652  | 2.695981  |
| H    | -3.76743  | 1.378857  | 3.466951  |
| C    | 1.315281  | 0.654623  | -2.51628  |
| H    | 1.359511  | 1.0179    | -3.550184 |
| C    | 3.876031  | -1.43897  | -0.587501 |
| C    | 1.427458  | 3.11507   | 1.465156  |
| C    | -4.913061 | -0.124726 | 2.460634  |
| H    | -5.801536 | 0.076299  | 3.051508  |
| C    | -0.913505 | 1.433268  | -2.651902 |
| H    | -0.483503 | 1.988014  | -3.497441 |
| C    | -2.741419 | -3.011498 | -0.979133 |
| H    | -1.775289 | -2.5606   | -0.823415 |
| C    | 2.512005  | -0.016773 | -2.092705 |
| C    | -3.786957 | -1.423851 | 0.703082  |
| C    | -4.968795 | -1.129468 | 1.478303  |
| C    | 2.423092  | 2.704859  | 0.575645  |
| H    | 2.724785  | 1.664013  | 0.541884  |
| C    | -2.58691  | 0.414438  | 1.960817  |
| C    | 3.112457  | -2.448237 | 1.624928  |
| H    | 2.139685  | -2.001406 | 1.507157  |
| C    | -6.176272 | -1.828781 | 1.256723  |
| H    | -7.043228 | -1.561461 | 1.854123  |

|   |           |           |           |
|---|-----------|-----------|-----------|
| C | -2.866396 | -4.051149 | -1.87697  |
| H | -1.989786 | -4.397343 | -2.415125 |
| C | -5.206413 | -4.241331 | -1.376932 |
| H | -6.171289 | -4.720266 | -1.515399 |
| C | 6.157537  | -2.033761 | -1.314942 |
| H | 6.930896  | -1.95024  | -2.072358 |
| C | 5.350697  | -2.867746 | 0.807977  |
| C | -1.756235 | 0.290977  | -3.217595 |
| H | -1.144898 | -0.32035  | -3.88631  |
| H | -2.604673 | 0.680371  | -3.786573 |
| H | -2.129216 | -0.35922  | -2.422761 |
| C | 3.377527  | -3.218708 | 2.736999  |
| H | 2.597311  | -3.360996 | 3.478477  |
| C | -3.067998 | 4.364309  | -0.313695 |
| H | -3.604096 | 5.11283   | 0.261449  |
| C | 1.701586  | 1.204737  | 3.12548   |
| H | 1.155098  | 0.594689  | 3.849942  |
| H | 2.462218  | 1.784053  | 3.657232  |
| H | 2.201776  | 0.52899   | 2.428367  |
| C | 0.728362  | 2.137916  | 2.395874  |
| H | 0.212204  | 2.74118   | 3.154627  |
| C | 1.081899  | 4.466842  | 1.497336  |
| H | 0.311945  | 4.803121  | 2.186374  |
| C | 4.748419  | -0.657476 | -2.766124 |
| H | 5.565698  | -0.644161 | -3.479218 |
| C | -1.106726 | 3.673778  | -1.531894 |
| H | -0.103731 | 3.888033  | -1.891222 |
| C | -1.787332 | 4.63166   | -0.791242 |
| H | -1.315342 | 5.586822  | -0.586338 |
| C | -3.6549   | 3.132662  | -0.578969 |
| H | -4.649773 | 2.909447  | -0.20691  |
| C | 3.577663  | -0.01953  | -3.030065 |
| H | 3.443688  | 0.507618  | -3.971243 |
| C | 5.599033  | -3.642786 | 1.960802  |
| H | 6.5756    | -4.106039 | 2.070521  |
| C | 6.373433  | -2.738938 | -0.181965 |
| H | 7.325952  | -3.231964 | -0.009588 |
| C | 4.631928  | -3.819402 | 2.920554  |
| H | 4.831651  | -4.419794 | 3.802296  |
| C | 2.690394  | 4.965778  | -0.227481 |
| H | 3.183727  | 5.681516  | -0.877687 |
| C | 3.044196  | 3.619897  | -0.268943 |
| H | 3.815194  | 3.277957  | -0.952515 |
| C | 1.708196  | 5.388099  | 0.663592  |
| H | 1.43106   | 6.436866  | 0.712576  |

---

[a] The geometry was optimized by DFT calculation (CAM-B3LYP/6-31+G(d,p)).

**Table S13.** Cartesian coordinates (in angstrom) of *A*-(*S,S*)-**1** in  $S_1$  state<sup>[a]</sup>.

| atom | x         | y         | z         |
|------|-----------|-----------|-----------|
| Zn   | 0.128246  | -0.606705 | -0.276643 |
| O    | -1.555385 | -1.620873 | -0.492401 |
| O    | 1.932296  | -1.195106 | -0.670185 |
| N    | 0.360013  | -0.63207  | 1.711675  |
| N    | -0.282519 | 0.727508  | -1.667159 |
| C    | -5.117301 | -3.550886 | 0.468337  |
| C    | 2.901558  | -1.305533 | 0.176098  |
| C    | -6.334444 | -3.079265 | -0.053028 |
| H    | -7.264513 | -3.584204 | 0.182249  |
| C    | -2.648389 | -1.129881 | -0.964037 |
| C    | -3.917912 | -2.920232 | 0.175894  |
| C    | 5.327776  | -1.758436 | 0.524946  |
| C    | -1.539608 | 0.822723  | 2.292691  |
| C    | 4.390617  | -1.849814 | -1.728882 |
| C    | -2.912647 | 0.856574  | 2.048809  |
| H    | -3.468018 | -0.074719 | 1.977032  |
| C    | -1.494441 | 0.826117  | -2.189441 |
| H    | -1.663126 | 1.544333  | -2.989901 |
| C    | -3.884254 | 0.460516  | -2.346158 |
| H    | -3.907394 | 1.326646  | -3.002372 |
| C    | 1.519982  | -0.861117 | 2.238193  |
| H    | 1.592363  | -0.882403 | 3.326894  |
| C    | 4.216962  | -1.641503 | -0.34447  |
| C    | 1.226176  | 2.642813  | -1.32201  |
| C    | -5.084835 | -0.180226 | -2.055131 |
| H    | -6.006762 | 0.190319  | -2.493086 |
| C    | -0.849672 | -0.507138 | 2.546912  |
| C    | 2.764861  | -1.123467 | 1.573893  |
| C    | -3.887806 | -1.77558  | -0.650134 |
| C    | -5.129926 | -1.303448 | -1.195693 |
| C    | 2.461094  | 2.647219  | -0.673886 |
| H    | 3.136649  | 1.806662  | -0.806961 |
| C    | -2.649825 | 0.060991  | -1.824117 |
| C    | -6.327459 | -1.964372 | -0.881617 |
| H    | -7.256032 | -1.591482 | -1.305245 |
| C    | 6.588806  | -2.076799 | -0.028964 |
| H    | 7.443376  | -2.166326 | 0.635551  |
| C    | 5.62822   | -2.161843 | -2.242822 |
| C    | -2.86812  | 3.265288  | 1.968093  |
| H    | -3.382261 | 4.213166  | 1.843263  |
| C    | 0.843816  | 1.482655  | -2.233068 |
| C    | 0.365326  | 3.726168  | -1.130527 |

|   |           |           |           |
|---|-----------|-----------|-----------|
| H | -0.610296 | 3.731503  | -1.607733 |
| C | 5.148315  | -1.560499 | 1.929911  |
| H | 6.001414  | -1.657427 | 2.593269  |
| C | -0.835687 | 2.025553  | 2.358284  |
| H | 0.238005  | 2.016302  | 2.521915  |
| C | -1.49539  | 3.239259  | 2.199758  |
| H | -0.932005 | 4.165004  | 2.247415  |
| C | -3.575456 | 2.070028  | 1.888205  |
| H | -4.643678 | 2.078481  | 1.695738  |
| C | 3.91503   | -1.266259 | 2.41519   |
| H | 3.779549  | -1.128074 | 3.485238  |
| C | 6.737575  | -2.273668 | -1.382263 |
| H | 7.713698  | -2.518855 | -1.789546 |
| C | 1.97789   | 4.794678  | 0.311891  |
| H | 2.27037   | 5.63146   | 0.938585  |
| C | 2.836488  | 3.714453  | 0.139616  |
| H | 3.802847  | 3.700327  | 0.634115  |
| C | 0.738296  | 4.795567  | -0.325962 |
| H | 0.059806  | 5.633061  | -0.194178 |
| C | -0.654201 | -0.72979  | 4.047829  |
| H | -0.020645 | 0.038577  | 4.500969  |
| H | -1.630798 | -0.67156  | 4.533067  |
| H | -0.23021  | -1.714877 | 4.263924  |
| H | -1.521468 | -1.290479 | 2.178694  |
| H | 1.687236  | 0.783988  | -2.215274 |
| C | 0.668604  | 1.94137   | -3.68305  |
| H | 1.618902  | 2.345768  | -4.039964 |
| H | 0.387778  | 1.10286   | -4.326695 |
| H | -0.077713 | 2.732558  | -3.793286 |
| H | -5.113643 | -4.427223 | 1.109488  |
| H | -2.981749 | -3.29953  | 0.56835   |
| H | 3.521358  | -1.762894 | -2.370094 |
| H | 5.751711  | -2.323336 | -3.308813 |

---

[a] The geometry was optimized by DFT calculation (CAM-B3LYP/6-31+G(d,p)).

**Table S14.** Cartesian coordinates (in angstrom) of  $\Delta$ -(S,S)-**2** in S<sub>1</sub> state<sup>[a]</sup>.

| atom | x         | y         | z         |
|------|-----------|-----------|-----------|
| Zn   | 0.052484  | -0.050008 | -0.097443 |
| O    | -1.636043 | -1.001993 | -0.508504 |
| O    | 1.795138  | -0.876917 | -0.043516 |
| N    | -0.071317 | 0.196933  | 1.878068  |
| N    | -0.00804  | 1.038945  | -1.733401 |
| C    | -5.63892  | -2.544549 | 0.104347  |
| C    | 2.650085  | -0.879898 | 0.92784   |
| C    | -6.661713 | -1.964603 | -0.699995 |
| H    | -7.686358 | -2.292176 | -0.558613 |
| C    | -2.624775 | -0.572804 | -1.204065 |
| C    | -4.264521 | -2.149371 | -0.055242 |
| C    | 4.926986  | -1.280452 | 1.761966  |
| C    | -1.982719 | 1.750992  | 1.871306  |
| C    | -5.021094 | -4.139492 | 1.833844  |
| H    | -5.302872 | -4.896965 | 2.558523  |
| C    | 4.457283  | -1.885461 | -0.589276 |
| C    | -3.301166 | 1.743589  | 1.41487   |
| H    | -3.870702 | 0.818592  | 1.436127  |
| C    | -1.103238 | 1.086184  | -2.470096 |
| H    | -1.078187 | 1.667086  | -3.390302 |
| C    | -3.45045  | 0.880641  | -3.002362 |
| H    | -3.287173 | 1.633832  | -3.76799  |
| C    | 0.972652  | -0.000494 | 2.615457  |
| H    | 0.869653  | 0.151574  | 3.690819  |
| C    | 4.003126  | -1.355519 | 0.694725  |
| C    | 1.824048  | 2.603415  | -1.249283 |
| C    | -4.731592 | 0.373486  | -2.816189 |
| H    | -5.542965 | 0.733394  | -3.44158  |
| C    | -1.388217 | 0.491516  | 2.478064  |
| C    | -3.306186 | -2.823401 | 0.746693  |
| H    | -2.263875 | -2.581997 | 0.620468  |
| C    | 2.293556  | -0.421559 | 2.229564  |
| C    | -3.946013 | -1.106688 | -1.014555 |
| C    | -5.018358 | -0.588823 | -1.828029 |
| C    | 3.078614  | 2.409949  | -0.672205 |
| H    | 3.634789  | 1.503589  | -0.893999 |
| C    | -2.372943 | 0.474209  | -2.2142   |
| C    | 3.623514  | -2.079439 | -1.721009 |
| H    | 2.578287  | -1.832173 | -1.642508 |
| C    | -6.347052 | -1.030938 | -1.648306 |
| H    | -7.121316 | -0.606576 | -2.281105 |
| C    | -3.672494 | -3.786911 | 1.664237  |

|   |           |           |           |
|---|-----------|-----------|-----------|
| H | -2.904836 | -4.281808 | 2.250717  |
| C | -5.979434 | -3.528087 | 1.05938   |
| H | -7.025453 | -3.801145 | 1.163648  |
| C | 6.288138  | -1.68014  | 1.569997  |
| H | 6.968129  | -1.600851 | 2.412706  |
| C | 5.823855  | -2.25973  | -0.732243 |
| C | 4.117003  | -2.587096 | -2.904322 |
| H | 3.440457  | -2.725017 | -3.742322 |
| C | -3.162817 | 4.090911  | 0.885665  |
| H | -3.619472 | 4.999365  | 0.505619  |
| C | 1.265303  | 1.582381  | -2.230074 |
| C | 1.112158  | 3.763939  | -0.938712 |
| H | 0.122283  | 3.915591  | -1.359246 |
| C | 4.54153   | -0.810904 | 3.045452  |
| H | 5.28037   | -0.785381 | 3.839239  |
| C | -1.255957 | 2.940498  | 1.816071  |
| H | -0.220575 | 2.958732  | 2.143493  |
| C | -1.84325  | 4.103693  | 1.329343  |
| H | -1.265707 | 5.021795  | 1.293778  |
| C | -3.89016  | 2.905424  | 0.925138  |
| H | -4.915343 | 2.880211  | 0.569773  |
| C | 3.260198  | -0.413078 | 3.267036  |
| H | 2.960743  | -0.068852 | 4.25371   |
| C | 6.304508  | -2.769032 | -1.95731  |
| H | 7.354666  | -3.038566 | -2.027108 |
| C | 6.720932  | -2.137451 | 0.373901  |
| H | 7.757426  | -2.431513 | 0.235049  |
| C | 5.470395  | -2.93098  | -3.037113 |
| H | 5.849552  | -3.326286 | -3.97402  |
| C | 2.910831  | 4.520768  | 0.481371  |
| H | 3.331927  | 5.266221  | 1.148712  |
| C | 3.620469  | 3.361023  | 0.189648  |
| H | 4.596286  | 3.19081   | 0.633408  |
| C | 1.653048  | 4.718873  | -0.085835 |
| H | 1.092703  | 5.621442  | 0.139054  |
| C | -1.427837 | 0.56425   | 4.005568  |
| H | -0.825193 | 1.390383  | 4.395125  |
| H | -2.460618 | 0.741525  | 4.312524  |
| H | -1.09784  | -0.369215 | 4.470569  |
| H | -2.027629 | -0.343275 | 2.169897  |
| H | 1.96561   | 0.737455  | -2.229272 |
| C | 1.245505  | 2.150537  | -3.650516 |
| H | 2.260741  | 2.454377  | -3.915174 |
| H | 0.916114  | 1.404817  | -4.379518 |
| H | 0.607623  | 3.035116  | -3.73668  |

---

[a] The geometry was optimized by DFT calculation (CAM-B3LYP/6-31+G(d,p)).

## 7. References

- [S1]. A. V. Wiznycia, J. Desper and C. J. Levy, Iron(II) and zinc(II) monohelical binaphthyl salen complexes, *Chem. Commun.*, 2005, 4693–4695.
- [S2]. R. Kuroda and Y. Saito, Solid-State Circular Dichroism Spectra of Tris(diamine)cobalt(III) Complexes: Decomposition into E and A<sub>2</sub> Components, *Bull. Chem. Soc. Jpn.* 1976, **49**, 433–436.
- [S3]. Gaussian 16, Revision C.01, M. J. Frisch, G. W. Trucks, H. B. Schlegel, G. E. Scuseria, M. A. Robb, J. R. Cheeseman, G. Scalmani, V. Barone, G. A. Petersson, H. Nakatsuji, X. Li, M. Caricato, A. V. Marenich, J. Bloino, B. G. Janesko, R. Gomperts, B. Mennucci, H. P. Hratchian, J. V. Ortiz, A. F. Izmaylov, J. L. Sonnenberg, D. Williams-Young, F. Ding, F. Lipparini, F. Egidi, J. Goings, B. Peng, A. Petrone, T. Henderson, D. Ranasinghe, V. G. Zakrzewski, J. Gao, N. Rega, G. Zheng, W. Liang, M. Hada, M. Ehara, K. Toyota, R. Fukuda, J. Hasegawa, M. Ishida, T. Nakajima, Y. Honda, O. Kitao, H. Nakai, T. Vreven, K. Throssell, J. A. Montgomery, Jr., J. E. Peralta, F. Ogliaro, M. J. Bearpark, J. J. Heyd, E. N. Brothers, K. N. Kudin, V. N. Staroverov, T. A. Keith, R. Kobayashi, J. Normand, K. Raghavachari, A. P. Rendell, J. C. Burant, S. S. Iyengar, J. Tomasi, M. Cossi, J. M. Millam, M. Klene, C. Adamo, R. Cammi, J. W. Ochterski, R. L. Martin, K. Morokuma, O. Farkas, J. B. Foresman and D. J. Fox, Gaussian, Inc., Wallingford CT, 2016.
